# Supplementary material for: Gynoecy instability in cucumber (Cucumis sativus L.) is due to unequal crossover at the copy number variation-dependent Femaleness (F) locus
Source: PubMed Central journal article supplement (PMC7072070; doi:10.1038/s41438-020-0251-2), 2020-03-15

**Supplementary File 1 (Fig. S1). Flow chart of work of the present study.**

**Resequencing reads alignment against  
993v2.0/Gy14v1.0 to confirm CNV at *F* locus**

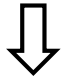

**FISH verification of the CNV (based on 9930 v2.0)**

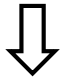

**One-end anchored PCR to confirm *F* locus size**

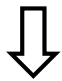

**Genomic DNA qPCR in natural population  
to confirm copy numbers of individual genes at *F* locus**

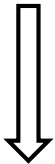

**Validation, annotation of *F* locus with  
9930v3.0/Gy14v2.0 assemblies**

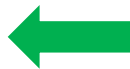

**Hypothesis: gynoecey instability is due to UCO among CNV**

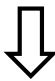

**Experimental evidence to prove hypothesis:**

- identification/characterization of 'gynoecey loss'  
mutants in two gynoeceious lines**

**Supplementary File 2 (Table S1). Information of primers used in this study.**

| Primer names                                       | Forward primer (5' to 3')  | Chromosome | 9930 V2.0  | 9930 V3.0  | Gy14 V2.0  | Reverse primer (5' to 3') | 9930 V2.0  | 9930 V3.0  | Gy14 V2.0  |
|----------------------------------------------------|----------------------------|------------|------------|------------|------------|---------------------------|------------|------------|------------|
| <b>Fiber FISH probes</b>                           |                            |            |            |            |            |                           |            |            |            |
| FISH-01                                            | TATGTCCCTACGCCCTAT         | Chr6       | 24,215,158 | 26,239,898 | 27,486,394 | CATGATACATTTACCCACA       | 24,216,862 | 26,241,602 | No hit     |
| FISH-02                                            | CCCTCTGTCCCTCTATT          | Chr6       | 24,217,202 | 26,241,914 | 27,488,444 | CCAAAGTTCCCTCGTCTCT       | 24,218,852 | 26,243,564 | 27,490,093 |
| FISH-03                                            | AGTAACGAAGACGAGGAA         | Chr6       | 24,218,829 | 26,243,541 | 27,490,070 | AAAGTTGGAGGAAAGAA         | 24,220,593 | 26,245,317 | 27,491,848 |
| FISH-04                                            | TTTCGGTATCTTCTATG          | Chr6       | 24,220,946 | 26,245,670 | 27,492,201 | TCTCCCTACCCCTATTTT        | 24,222,677 | 26,247,409 | 27,493,940 |
| FISH-05                                            | TTTACC GTTGATGCTCGTC       | Chr6       | 24,222,941 | 26,247,648 | 27,494,215 | AGGTCTAATGGGTGATAG        | 24,224,814 | 26,249,564 | 27,496,088 |
| FISH-06                                            | ATTAGACCTATTCAACCCAT       | Chr6       | 24,224,806 | 26,249,556 | 27,496,080 | CAAGAAACATATCCTGCA        | 24,226,799 | 26,251,411 | 27,497,934 |
| FISH-07                                            | TCATTTCTGGGCGTTCCT         | Chr6       | 24,226,841 | 26,251,453 | 27,497,976 | TCCTTTCATTTCCGGCTCT       | 24,228,592 | 26,253,204 | 27,499,726 |
| FISH-08                                            | AAAGAAAGTGAATCAAGGTT       | Chr6       | 24,228,794 | 26,253,406 | 27,499,928 | CAATGAAGGGAAAAGAAA        | 24,230,740 | 26,255,351 | 27,501,865 |
| FISH-09                                            | TTGATTGGAAGGAGAAGC         | Chr6       | 24,230,997 | 26,255,608 | 27,502,122 | CAACTCCATAACGGGTCA        | 24,232,547 | 26,257,170 | 27,503,684 |
| FISH-10                                            | TTTATTACTAGTTGTGCTTAC      | Chr6       | 24,232,682 | 26,257,305 | 27,503,819 | ATGCTGATAGTTATCGGA        | 24,234,668 | 26,259,291 | 27,505,805 |
| FISH-11                                            | CATCCCTTCTCATTGTAA         | Chr6       | 24,234,865 | 26,259,488 | 27,506,002 | TGTTTTCGTTCCTTTTAC        | 24,236,554 | 26,261,177 | 27,507,690 |
| FISH-12                                            | TCCTCCACTAACCCATTC         | Chr6       | 24,236,874 | 26,261,497 | 27,508,010 | TTTCCCTTCTCCTGACT         | 24,238,436 | 26,263,059 | 27,509,570 |
| FISH-13                                            | CTGTTTTGAATCGGTCAG         | Chr6       | 24,238,574 | 26,263,197 | 27,509,708 | CCTTTTCTTTTATTACC         | 24,240,466 | 26,265,089 | 27,511,599 |
| FISH-14                                            | GAAGAAGGAAGGAGGAAT         | Chr6       | 24,240,721 | 26,265,344 | 27,511,847 | TCTCACAATGAAAGGGA         | 24,242,490 | 26,267,113 | 27,513,655 |
| FISH-15                                            | GATAATGAAGCAATACCC         | Chr6       | 24,242,435 | 26,267,058 | 27,513,600 | AAGTTCGACCAATAAGTT        | 24,244,342 | 26,268,963 | 27,515,501 |
| FISH-16                                            | AAGGGTACTAATTATTGG         | Chr6       | 24,244,316 | 26,268,937 | 27,515,475 | AATGATGTGATGGCTGA         | 24,246,112 | 26,270,699 | 27,517,178 |
| FISH-17                                            | CAAATGAATACGGGAACA         | Chr6       | 24,246,313 | 26,270,900 | 27,517,379 | TTACTTCAGGTGCGATGC        | 24,248,153 | 26,272,740 | 27,578,997 |
| FISH-18                                            | GAAGATAGGCAGGCAACG         | Chr6       | 24,248,349 | 26,272,936 | 27,579,193 | TTGGAACTATTTCAAGTTTG      | 24,249,976 | 26,274,563 | 27,580,820 |
| FISH-19                                            | ACCTGAGATGCAAGAGCA         | Chr6       | 24,250,090 | 26,274,677 | 27,580,934 | CCTTTGACCGAACCTGTA        | 24,251,893 | 26,276,480 | 27,582,737 |
| <b>Anchor PCR, CNV, 5' end (left)</b>              |                            |            |            |            |            |                           |            |            |            |
| Anchor-L1                                          | AGCTTAAACACGTAGGTATGAATAAA | Chr6       | 24,213,203 | 26,237,942 | 27,484,439 | TGGTGTGAATCAACCACACTTA    | 24,214,158 | 26,238,894 | 27,485,395 |
| Anchor-L2                                          |                            | Chr6       |            |            |            | TAACATATCAAAGGCTCATGTCGI  | 24,215,208 | 26,239,948 | 27,486,444 |
| Anchor-L3                                          |                            | Chr6       |            |            |            | TAAAAGGAATTGGAACCTAAATC   | 24,216,223 | 26,240,963 | 27,487,481 |
| Anchor-L4                                          |                            | Chr6       |            |            |            | TCTGCCATTTTCTTTTTCACCTT   | 24,217,064 | 26,241,804 | 27,488,334 |
| Anchor-L5                                          |                            | Chr6       |            |            |            | TAATTACTTGATTCTCGGCAAGAC  | 24,217,991 | 26,242,703 | 27,489,232 |
| <b>Anchor PCR, CNV, CsACSI-BCAT junction point</b> |                            |            |            |            |            |                           |            |            |            |
| Anchor-JP1                                         | TTTTAAGATCCAGGTGTCCTTTGAG  | Chr6       | 24,243,275 | 26,267,896 | 27,514,434 | AATGCGGGTAAGCCGTGGT       | 24,218,222 | 26,242,934 | 27,489,463 |
| Anchor-JP2                                         | GATTAGTCAAGATGTTGGTGGTTGG  | Chr6       | 24,244,215 | 26,268,836 | 27,515,374 |                           |            |            |            |
| Anchor-JP3                                         | CGATGTTTCCTTCTTGATATA      | Chr6       | 24,245,335 | 26,269,922 | 27,516,400 |                           |            |            |            |
| Anchor-JP4                                         | TCAAAAACAAATGAATACGGGAACA  | Chr6       | 24,246,306 | 26,270,893 | 27,517,372 |                           |            |            |            |
| Anchor-JP5                                         | TCAAACGGCCTATTTCTTTCTT     | Chr6       | 24,247,284 | 26,271,871 | 27,518,344 |                           |            |            |            |
| <b>Anchor PCR, CNV, 3' end</b>                     |                            |            |            |            |            |                           |            |            |            |
| Anchor-R1                                          | AGATGAAGGTTTTGCGTTGAAGTAT  | Chr6       | 24,245,068 | 26,269,655 | 27,516,135 | TTACCAGATTACAAATGGGGCTT   | 24,246,031 | 26,270,618 | 27,517,097 |
| Anchor-R2                                          |                            | Chr6       |            |            |            | CTGACAATTTAGCTTTGGACGGTA  | 24,247,026 | 26,271,613 | 27,518,087 |
| Anchor-R3                                          |                            | Chr6       |            |            |            | TACAACCTGAATCTTCCGAACAGT  | 24,248,022 | 26,272,609 | 27,578,866 |
| Anchor-R4                                          |                            | Chr6       |            |            |            | AAAAGCAAAAGGCTATTCTGATG   | 24,249,012 | 26,273,599 | 27,579,856 |
| Anchor-R5                                          |                            | Chr6       |            |            |            | ATGTTTACCTGTTGGGAACACTAT  | 24,249,988 | 26,274,575 | 27,580,832 |
| Anchor-R6                                          |                            | Chr6       |            |            |            | TTGACCATTGGATTGGAACAGAA   | 24,251,012 | 26,275,599 | 27,581,856 |
| <b>Sequencing, CsACSIg promoter</b>                |                            |            |            |            |            |                           |            |            |            |
| CsACSIg-seq                                        | TCAAAAACAAATGAATACGGGAACA  | Chr6       | 24,246,306 | 26,270,893 | 27,517,372 | AATGCGGGTAAGCCGTGGT       | 24,218,222 | 26,242,934 | 27,489,463 |
| <b>qPCR for copy # of genomic DNA</b>              |                            |            |            |            |            |                           |            |            |            |
| CsACSIg-gDNA                                       | AAGGCATTGGTAGAATTTATGGCGG  | Chr6       | 24,218,227 | 26,242,939 | 27,489,468 | TGGATAGTATGGAGTTGGGAGGA   | 24,218,388 | 26,243,100 | 27,489,629 |
| CsMYB-gDNA                                         | TAGATTGATGAGCAAAAGCAGGAGC  | Chr6       | 24,236,713 | 26,261,336 | 27,507,849 | TATGGGATGATGCCAAGCAGTAG   | 24,236,863 | 26,261,486 | 27,507,999 |
| CsBCAT-gDNA1 (Exons 9 and 10)                      | AAATCTCTTGGGACTGGCAGAAAAG  | Chr6       | 24,245,913 | 26,270,500 | 27,516,979 | AAATGGTGTGGGGTTGTTTAC     | 24,246,072 | 26,270,659 | 27,517,138 |
| BCAT-gDNA2 (Exons 1-8)                             | TACTGCTTCCACAACTGATCAAC    | Chr6       | 24,251,141 | 26,275,728 | 27,581,985 | TGAGGGTCTAAAGGCGTACAGAA   | 24,251,280 | 26,275,867 | 27,582,124 |
| F-gDNA (CsACSIg junction point)                    | CGGACGGGCATAGTTATGAGC      | Chr6       | 24,247,441 | 26,272,028 | 27,518,501 | AGTGTCTCCGACCAGAGCAGGTA   | 24,217,355 | 26,242,067 | 27,488,597 |
| <b>qPCR for mRNA expression</b>                    |                            |            |            |            |            |                           |            |            |            |
| CsACSI-mRNA                                        | GGGTCTTGGCAGAACTCAACTAT    | Chr6       | 24,217,966 | 26,269,922 | 27,489,207 | GGGTAAGCCGTGGTAATCTTGG    | 24,218,217 | 26,242,929 | 27,489,458 |
| CsMYB-mRNA                                         | TCGGAGAAGCCTCCATGTTTG      | Chr6       | 24,237,529 | 26,262,152 | 27,508,665 | GCCTTGCCTCAAAAATAGGTCTT   | 24,237,712 | 26,262,355 | 27,508,868 |
| CsACS2                                             | CCTTACTATCCTGGATTGACAGAG   | Chr1       | 21,939,051 | no hit     | no hit     | AATGTCTCGATTGTGGAGCGTTC   | 21,939,944 | 12,940,823 | 12,959,445 |
| CsActin2 (reference)                               | ATTCTTGATCTCTAAGTACCTTCC   | Chr6       | 22,425,592 | 24,457,766 | 25,695,808 | CCAACTAAAGGGAAATAACTCAC   | 22,425,839 | 24,458,013 | 25,696,055 |

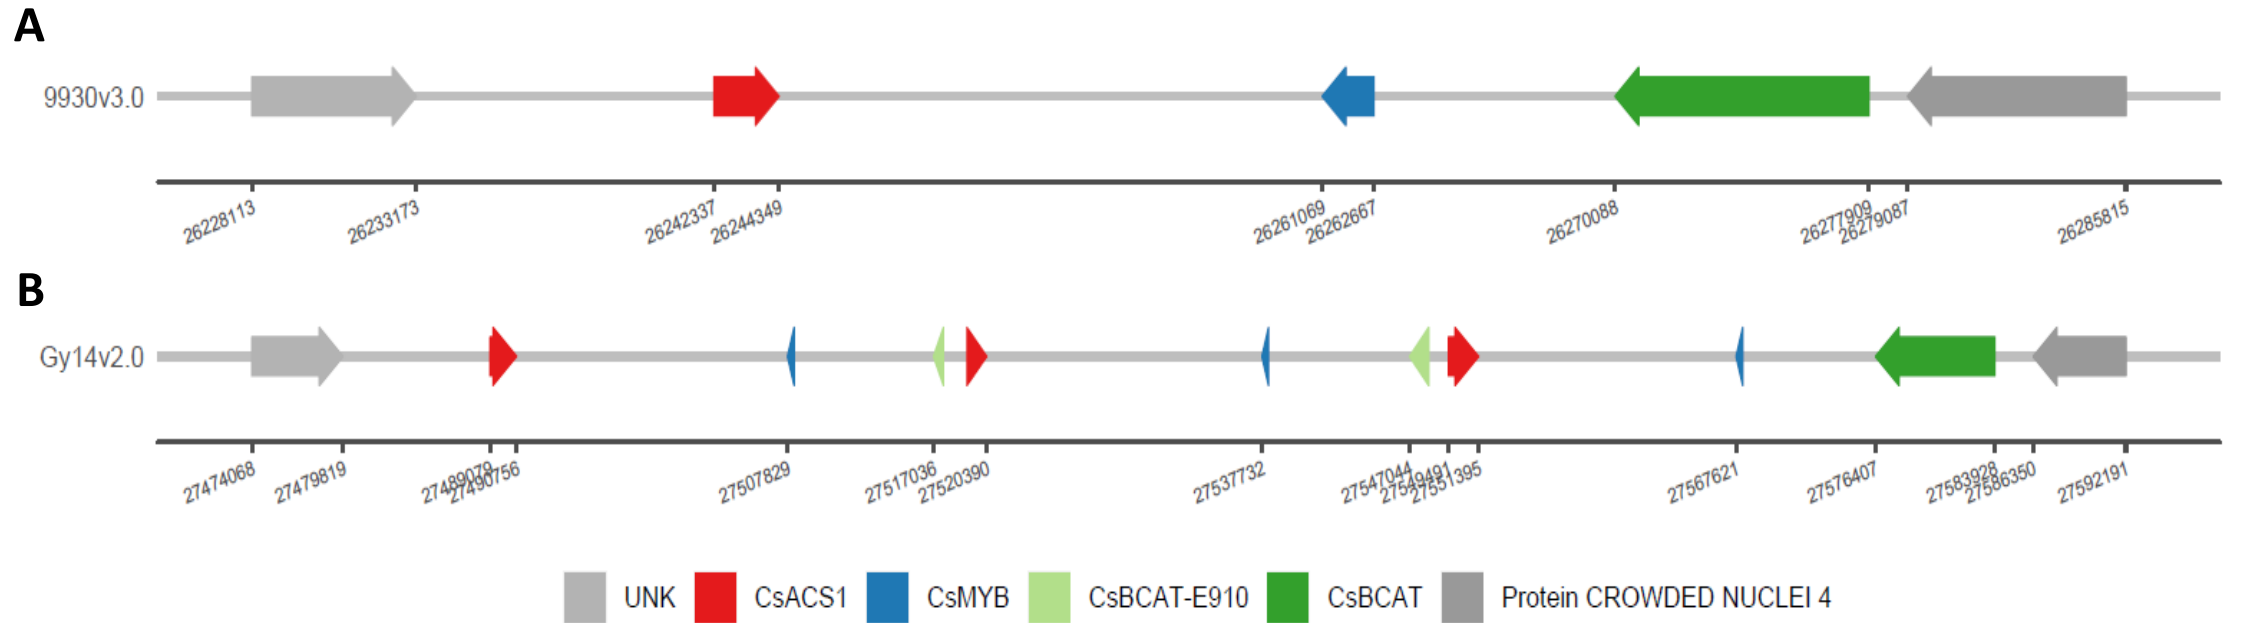

**Supplementary File 3 (Figure S2). Annotation of the *F/f* locus in 9930 V3.0 (up) and Gy14 V2.0 (down) region.** The *CsACS1* region in monoecious 9930 spans ~35.5 kb harboring three predicted genes (*CsACS1*, *CsMYB* and *CsBCAT*) which is ~94.8 kb in Gy14 V2.0 that is predicted to have three tandem repeats including one copy of *CsACS1*, and two copies of *CsACSIG*. Each *CsACSIG* consists of a recombinant promoter from BCAT exons 9 and 10, and *CsACS1*. Note the orientations of each gene are different.

**Supplementary File 4 (Figure S3).** Alignment of genomic DNA sequences of *CsACS1* from 9930 and Gy14, and *CsACS1G* from Gy14 and a gynocious line (Marketmore 76F, DQ839406) reported in Knopf and Trebitsh<sup>38</sup>. The annotated regions in 9930 *CsACS1* are highlighted in yellow following Trebitsh et al<sup>34</sup>.

```
9930_ACS1      AATAATAATAAGAACAAGAACAACAAAAAGGCTGTTTTGGATGGAAAAACTATTTTTT 60
Gy14_ACS1     -----GAACAAGAACAACAACAAAAAGGCTGTTTTGGATGGAAAAACTATTTTTT 49
Gy14_ACS1G    -----
DQ839406_ACS1G.1 AAAGGTAACGATGATTCTACAAAATCACCCATATGCTACGATAGACTGACGGTCCAATT 60

9930_ACS1     CTTCCTATTTTTGGGTGGTAAA---CGTAGAATATTGAATAATATAATGAATTGATTTG 117
Gy14_ACS1     CTTCCTATTTTTGGGTGGTAAA---CGTAGAATATTGAATAATATAATGAATTGATTTG 106
Gy14_ACS1G    -----
DQ839406_ACS1G.1 CTTTTTATCTTCGATAAGTCCCATTGTAACTCGGTAAGTACAGAATAGAGTTGTTGTA 120

9930_ACS1     AAAAATACTTACCA-----ACCCCTAAAGGGAAATTAGGTG 152
Gy14_ACS1     AAAAATACTTACCA-----ACCCCTAAAGGGAAATTAGGTG 141
Gy14_ACS1G    -----TCCATAAGCAATCCTGCAAAAAATTCAGCCATCACATCAATTG 42
DQ839406_ACS1G.1 AACACCCCAACACCATTTCATAAGCAAATCCATGCAAAAATTCAGCCATCACATCAATTG 180
                      * * * * *
Begin BCAT Exon 10 (reverse)
9930_ACS1     TGTGTGTATAGAGTATAGAGAG-----ACATGAAGTAGGGTGTCTCCGGCCGACG 204
Gy14_ACS1     TGTGTGTATAGAGTATAGAGAG-----ACATGAAGTAGGGTGTCTCCGGCCGACG 193
Gy14_ACS1G    TAAGGAAAATGCTTCAAAAACACACGTCATATTATGCCCCTACTCGAGCAACCACG 102
DQ839406_ACS1G.1 TAAGGAAAATGCTTCAAAAACACACGTCATATTATGCCCCTACTCGAGCAACCACG 240
                      * * * * *
9930_ACS1     GACATAAACTTTTGATATGAGACCTGTTTTGTCCAACCTTTTCAGCCTTTTACAAAGTGT 264
Gy14_ACS1     GACATAAACTTTTGATATGAGACCTGTTTTGTCCAACCTTTTCAGCCTTTTACAAAGTGT 253
Gy14_ACS1G    TAAAAAGAGTGGAGATATAAGCTCAATCTAGTCAAACGATTTCCCATTTCCAAGACCAC 162
DQ839406_ACS1G.1 TAAAAAGAGTGGAGATATAAGCTCAATCTAGTCAAACGATTTCCCATTTCCAAGACCAC 300
                      * * * * *
9930_ACS1     GTTTGTTGCTTTGATATGGACGGGTTTTAGACTACAGGTGGAATTAAGATCCTACTTAT 324
Gy14_ACS1     GTTTGTTGCTTTGATATGGACGGGTTTTAGACTACAGGTGGAATTAAGATCCTACTTAT 313
Gy14_ACS1G    TAGTGA-----TGATGAATGGTTTGTGTTGAAGAGACTTAAATACCATTCTACGTAT 214
DQ839406_ACS1G.1 TAGTGA-----TGATGAATGGTTTGTGTTGAAGAGACTTAAATACCATTCTACGTAT 352
                      * * * * *
                      -1622 (DQ839406)
9930_ACS1     GCTTTTCAATTTTATTA-ATTCATTGACGATAGATTTTACT---CTCTAATGTTTATTTG 380
Gy14_ACS1     GCTTTTCAATTTTATTA-ATTCATTGACGATAGATTTTACT---CTCTAATGTTTATTTG 369
Gy14_ACS1G    GTGTTGCAATCTCTCTAGTTTCAAAAACAATGAATACGGGAACATGTACTTTCTTTCAA 274
DQ839406_ACS1G.1 GTGTTGCAATCTCTCTAGTTTCAAAAACAATGAATACGGGAACATGTACTTTCTTTCAA 412
                      * * * * *
9930_ACS1     TCA----TCATTTGAGATTT-----AGGTTCCAATTCCTTTTACTCAC 419
Gy14_ACS1     TCA----TCATTTGAGATTT-----AGGTTCCAATTCCTTTTACTCAC 408
Gy14_ACS1G    TCAGAACTCAATTTCAATTTCCCAACTACTCATTCACGTGTTTCGCTGTCTCAATGTG 334
DQ839406_ACS1G.1 TCAGAACTCAATTTCAATTTCCCAACTACTCATTCACGTGTTTCGCTGTCTCAATGTG 472
                      * * * * *
                      Auxin Responsive factor binding
9930_ACS1     TAAATATTTAT-----TCTTTATCCATTTAATGTTAATGTTTTCGTTAAT 464
Gy14_ACS1     TAAATATTTAT-----TCTTTATCCATTTAATGTTAATGTTTTCCTTAAAT 453
Gy14_ACS1G    TCCAGATATTGTTTTGTAAAATTTACCTTTTCCGAGATATGTGACGCTGCCACACAGGT 394
DQ839406_ACS1G.1 TCCAGATATTGTTTTGTAAAATTTACCTTTTCCGAGATATGTGACGCTGCCACACAGGT 532
                      * * * * *
                      Start of 9th intron (reverse)
9930_ACS1     TAAATTTTCACTATTTT-----TCATCCTTTTTTACACTTAAATTTAGAATTTCCC- 514
Gy14_ACS1     TAAATTTTCACTATTTT-----TCATCCTTTTTTACACTTAAATTTAGAATTTCCC- 503
Gy14_ACS1G    GATATAACCAGCTGCTGTCCCGTACAAAAGACCTCGTCAGCTCAAGTAATTCATCCACT 454
DQ839406_ACS1G.1 GATATAACCAGCTGCTGTCCCGTACAAAAGACCTCGTCAGCTCAAGTAATTCATCCACT 592
                      * * * * *
9930_ACS1     -----TTCATAATTTTATAATTTTAAATTTGATGAAAGTGAGTATTATTT 562
Gy14_ACS1     -----TTCATAATTTTATAATTTTAAATTTGATGAAAGTGAGTATTATTT 551
Gy14_ACS1G    GCCACAAGTCGTTCCCTCGACCTGACACTCATTCAAATCAGTGCCCACTTCTCTCGTCTTT 514
DQ839406_ACS1G.1 GCCACAAGTCGTTCCCTCGACCTGACACTCATTCAAATCAGTGCCCACTTCTCTCGTCTTT 652
                      * * * * *
BACT Exon 9 (reverse)
```

```

9930_ACS1      AATGAAAAATCAATTGTAGA----AGTGCAA-----AATTTA 595
Gy14_ACS1     AATGAAAAATCAATTGTAGA----AGTGCAA-----AATTTA 584
Gy14_ACS1G    TTATCACAATCCATTATTTTACCAAGACAAACAATAATTCCTTACGCAGGTATTTAA 574
DQ839406_ACS1G.1 TTATCACAATCCATTATTTTACCAAGACAAACAATAATTCCTTACGCAGGTATTTAA 712
                * * * * * * * * * * * * * * * * * * * * * * * * * * * *
                Potential ORF start (ATG reverse)
9930_ACS1     AAAACTTATATT---CGACTAAACTGAAACTGAAATTAACCTTAGGAACTAAGTCCTCC 651
Gy14_ACS1     AAAACTTATATT---CGACTAAACTGAAACTGAAATTAACCTTAGGAACTAAGTCCTCC 640
Gy14_ACS1G    ACAACGTACAAAAGAGAGAACCAACTCAATCACATTTTCGACTTACAAAACATTTGTAAA 634
DQ839406_ACS1G.1 ACAACGTACAAAAGAGAGAACCAACTCAATCACATTTTCGACTTACAAAACATTTGTAAA 772
                * * * * * * * * * * * * * * * * * * * * * * * * * * * *

9930_ACS1     TTTGCTTATAACCATTTAGAATCCTAGATTATGTTTTGTCTTTAAAAATAGGTTTATTT 711
Gy14_ACS1     TTTGCTTATAACCATTTAGAATCCTAGATTATGTTTTGTCTTTAAAAATAGGTTTATTT 700
Gy14_ACS1G    TATGT-TGAGATGAGATCAAATCTAAATATAGGAAATTAATTTGAAAGTAGTTTTTTT- 692
DQ839406_ACS1G.1 TATGT-TGAGATGAGATCAAATCTAAATATAGGAAATTAATTTGAAAGTAGTTTTTTT- 830
                * * * * * * * * * * * * * * * * * * * * * * * * * * * *

9930_ACS1     TCTCTTTTATTTTCATCTTTGTTGGGTAAAAGAATTGAATTAATTTAAAAACAAAAACA 771
Gy14_ACS1     TCTCTTTTATTTTCATCTTTGTTGGGTAAAAGAATTGAATTAATTTAAAAACAAAAATA 760
Gy14_ACS1G    ----TTAG--TACAC-CCAAGTGAA----CACCACAATTAATCTCATAAGAGAAATTC 739
DQ839406_ACS1G.1 ----TTAG--TACAC-CCAAGTGAA----CACCACAATTAATCTCATAAGAGAAATTC 877
                * * * * * * * * * * * * * * * * * * * * * * * * * * * *
                -1594 (DQ839406)
9930_ACS1     AAATTTTAAAAACTATCTTTTAAAGTTTTCAAATTTTAACTTAGTTTTTGAAA----- 824
Gy14_ACS1     AAATTTTAAAAACTATCTTTTAAAGTTTTCAAATTTTAACTTAGTTTTTGAGAATGTGGA 820
Gy14_ACS1G    TAAGATATAAAATCCTGGTAAAGGTCATCTTGATTGAACCTATTCTCTTCAACTCTTTT 799
DQ839406_ACS1G.1 TAAGATATAAAATCCTGGTAAAGGTCATCTTGATTGAACCTATTCTCTTCAACTCTTTT 937
                * * * * * * * * * * * * * * * * * * * * * * * * * * * *

9930_ACS1     -----ATGTTGATAGAGAGTAAATAACAAAATAAGA--ATTTTAAAGTG 867
Gy14_ACS1     TAGAGGTTTTTGAGAATGTTGATAGAGTAAATAACAAAATAAGA--ATTTTAAAGTG 878
Gy14_ACS1G    ATCAATCCTATAGATATTTAGAATTTGACCATTAGACCAACTCAAATGGTTTATACCTT 859
DQ839406_ACS1G.1 ATCAATCCTATAGATATTTAGAATTTGACCATTAGACCAACTCAAATGGTTTATACCTT 997
                * * * * * * * * * * * * * * * * * * * * * * * * * * * *

9930_ACS1     AAAGAGATGTTATTTATGATCTAATTGAGATTTTAAAAAATTTAAAACAAAAAAGT-TAT 926
Gy14_ACS1     AAAGAGATGTTATTTATGATCTAATTGAGATTTTAAAAAATTTAAAACAAAAAAGT-TAC 937
Gy14_ACS1G    TAAAAGTTCAGAGTATAACAACCTTTAA-TATTAC-----AAATCCCACAGTAAAT 912
DQ839406_ACS1G.1 TAAAAGTTCAGAGTATAACAACCTTTAA-TATTAC-----AAATCCCACAGTAAAT 1050
                * * * * * * * * * * * * * * * * * * * * * * * * * * * *

9930_ACS1     AGAACTATTTTAAATATTAATAAAAT-----AAACAAAACATTTACAAAATATACTAAA 981
Gy14_ACS1     ATAACTATTTTAAATAT-AATAAAAT-----AAACAAAACAATTACAAAATATACTAAA 991
Gy14_ACS1G    AGTATTTCTTTTAAATACCGTCCAAGCTAAATGTGCAAGCATGCATTTTATTGACAA 972
DQ839406_ACS1G.1 AGTATTTCTTTTAAATACCGTCCAAGCTAAATGTGCAAGCATGCATTTTATTGACAA 1110
                * * * * * * * * * * * * * * * * * * * * * * * * * * * *
                CArG transcription regulator
9930_ACS1     ATATCAAAGTCTACAA-----TAAACAACAATTTATCAAATAGATTAGACTATTACATG 1036
Gy14_ACS1     ATATCAAAGTCTACAA-----TAAATAACAATTTATCAAATAGATTAGACTATTAT--G 1044
Gy14_ACS1G    CTAGACCAACCTAAGATGTTTCCCTCTAAAAATATTTTCAGAAATTTATTATACAA-TACTAG 1031
DQ839406_ACS1G.1 CTAGACCAACCTAAGATGTTTCCCTCTAAAAATATTTTCAGAAATTTATTATACAA-TACTAG 1169
                * * * * * * * * * * * * * * * * * * * * * * * * * * * *

9930_ACS1     TGGTAAATGTATCATGAACAAAA-----TAGTAGT---CTATGATAGTTTACTATAG 1087
Gy14_ACS1     TGATAAATGTATCATGAACAAAA-----TAGCAGT---CTATGATAGTTTACTATAG 1095
Gy14_ACS1G    TTGCTAAATAGATCCATTTTACAAATAATACGAGTAAGCTTCACAAATGGT-T-TTATTA 1089
DQ839406_ACS1G.1 TTGCTAAATAGATCCATTTTACAAATAATACGAGTAAGCTTCACAAATGGT-TTATTA 1228
                * * * * * * * * * * * * * * * * * * * * * * * * * * * *

9930_ACS1     ATTGTGATATTTTAGTATAGTGATAAATGTT---TGTATAAATTTTATCATTTAAAATA 1143
Gy14_ACS1     ATTGTGATATTTTAGTATAGTGATAAATGTT---TGTATAAATTTTATCATTTAAAATA 1151
Gy14_ACS1G    CATGCATTATATGGACATTTTAAAGTGATCTAATAAGACAATTTTGGACCTATTACGAA 1149
DQ839406_ACS1G.1 CATGCATTATATGGACATTTTAAAGTGATCTAATAAGACAATTATTTGACCCTATTACGAA 1288
                * * * * * * * * * * * * * * * * * * * * * * * * * * * *
                CArG transcription regulator
9930_ACS1     AAAATTGAGAGTAAAAATACATTTAAAAGAAAAAAGAAAGAAATGAATTAATTAGGAGG- 1202
Gy14_ACS1     AAATTCGAGAGTAAAAATACATTTAAAAGAA-AAAAGAAAAGAAATGAATTAATTAGGAGG- 1209
Gy14_ACS1G    AAAGACAATGTCAAAGAT---ATCTAGGCTGCCACTGGAGCATGCCCTCACTGAACAAA 1205
DQ839406_ACS1G.1 AAAGACAATGTCAAAGAT---ATCTAGGCTGCCACTGGAGCATGCCCTCACTGAACAAA 1344
                * * * * * * * * * * * * * * * * * * * * * * * * * * * *

```

```

9930_ACS1      ---AGAAAGAGTAAATGGTAAATGGATGTTAATTAAGGTGAAAGAAGAAAATGGCAGACAGA 1259
Gy14_ACS1     ---AG-----AAAGAGTAAATGGATGTTAATTAAGGTGAAAGAAGAAAATGGCAGACAGA 1260
Gy14_ACS1G    ATCAAACGGCCATTTTCCCTTTCTTTT-TGTTTTTCATTAAAATAATC--ACTCCTT 1262
DQ839406_ACS1G.1 ATCAAACGGCCATTTTCCCTTTCTTTT-TGTTTTTCATTAAAATAATC--ACTCCTT 1401
                *       *       *       *       *       *       *       *       *       *
                -600                                     -550

9930_ACS1     GAGTGGCTGGTGATTGTGT-AATGAGGGAACACATTGAGCCCACCCACAGTTCATATT 1318
Gy14_ACS1     GAGTGGCTGGTGATTGTGT-AATGAGGGAACACATTGAGCCCACCCACAGTTCATATT 1319
Gy14_ACS1G    CATTGATATGCAACTTAGCAAAATATATAAAATACTAGATAAGAAAACCC-AAATCAAGAG 1321
DQ839406_ACS1G.1 CATTGATATGCAACTTAGCAAAATATATAAAATACTAGATAAGAAAACCC-AAATCAAGAG 1460
                * * *       * * *       * * *       * * *       * * *       * * *

9930_ACS1     TTGATTTTGGAGATCAGGTGGGTCTTTTTTCCCATCTTCTCTAACCCCTCCTGTCCCTC 1378
Gy14_ACS1     TTGATTTTGGAGATCAGGTGGGTCTTTTTTCCCATCTTCTCTAACCCCTCCTGTCCCTC 1379
Gy14_ACS1G    AAGCAACGACAAAAACAGGGTGGTTT--AAGTATTTAACTACTTCGGACGGGCATAGTT 1378
DQ839406_ACS1G.1 AAGCAACGACAAAAACAGGGTGGTTT--AAGTATTTAACTACTTCGGACGGGCATAGTT 1517
                *       *       * * * * *       * * *       * * *       *

                Distal promoter (start of BCAT 8th intron)

9930_ACS1     TATTTTCTTCTTTCTATGTTTTCCCTAACAAATTAACCCCCAAATCATTAACTTTT 1438
Gy14_ACS1     TATTTTCTTCTTTCTATGTTTTCCCTAACAAATTAACCCCCAAATCATTAACTTTT 1439
Gy14_ACS1G    ATGAGCAACATTAATTATGTTTTCCCTAACAAATTAACCCCCAAATCATTAACTTTT 1438
DQ839406_ACS1G.1 ATGAGCAACATTAATTATGTTTTCCCTAACAAATTAACCCCCAAATCATTAACTTTT 1577
                *
                *****

                -410 Proximal promoter start/braking point

9930_ACS1     CATTATCCCATTCATTTTTGTTTCATAATCCCATTTCATCTCCATATCAAACCATAC 1498
Gy14_ACS1     CATTATCCCATTCATTTTTGTTTCATAATCCCATTTCATCTCCATATCAAACCATAC 1499
Gy14_ACS1G    CATTATCCCATTCATTTTTGTTTCATAATCCCATTTCATCTCCATATCAAACCATAC 1498
DQ839406_ACS1G.1 CATTATCCCATTCATTTTTGTTTCATAATCCCATTTCATCTCCATATCAAACCATAC 1637
                *****

9930_ACS1     CTGCTCTGGTCGGAGACACTTTCATAAATAATTCCTCAAATCATCACTGTTTATCAACC 1558
Gy14_ACS1     CTGCTCTGGTCGGAGACACTTTCATAAATAATTCCTCAAATCATCACTGTTTATCAACC 1559
Gy14_ACS1G    CTGCTCTGGTCGGAGACACTTTCATAAATAATTCCTCAAATCATCACTGTTTATCAACC 1558
DQ839406_ACS1G.1 CTGCTCTGGTCGGAGACACTTTCATAAATAATTCCTCAAATCATCACTGTTTATCAACC 1697
                *****

9930_ACS1     CCCTTAATTAATTAATTAATATCAAACACACTCTCTATATTATCTCTACAATCTAAATAA 1618
Gy14_ACS1     CCCTTAATTAATTAATTAATATCAAACACACTCTCTATATTATCTCTACAATCTAAATAA 1619
Gy14_ACS1G    CCCTTAATTAATTAATTAATATCAAACACACTCTCTATATTATCTCTACAATCTAAATAA 1618
DQ839406_ACS1G.1 CCCTTAATTAATTAATTAATATCAAACACACTCTCTATATTATCTCTACAATCTAAATAA 1757
                *****

9930_ACS1     TATACCTATATATATATATATTTGTCTCTTATTTAATTAGACCAATTAATTAATCTAT 1678
Gy14_ACS1     TATACCTATATATATATATATTTGTCTCTTATTTAATTAGACCAATTAATTAATCTAT 1679
Gy14_ACS1G    TATACCTATATATATATATATTTGTCTCTTATTTAATTAGACCAATTAATTAATCTAT 1678
DQ839406_ACS1G.1 TATACCTATATATATATATTTGTCTCTTATTTAATTAGACCAATTAATTAATCTAT 1817
                *****

                Auxin Responsive factor binding

9930_ACS1     AACCAAATCCCAGACCCACATGTGGTCAAAGTTTTTGTGTCACCATCTACGTGGCCT 1738
Gy14_ACS1     AACCAAATCCCAGACCCACATGTGGTCAAAGTTTTTGTGTCACCATCTACGTGGCCT 1739
Gy14_ACS1G    AACCAAATCCCAGACCCACATGTGGTCAAAGTTTTTGTGTCACCATCTACGTGGCCT 1738
DQ839406_ACS1G.1 AACCAAATCCCAGACCCACATGTGGTCAAAGTTTTTGTGTCACCATCTACGTGGCCT 1877
                *****

                ABA responsive

9930_ACS1     ATGGATTTGTCTTATAAATACCACCCTATGTTGCTGAACACCTCTCCAACCTCAAACAT 1798
Gy14_ACS1     ATGGATTTGTCTTATAAATACCACCCTATGTTGCTGAACACCTCTCCAACCTCAAACAT 1799
Gy14_ACS1G    ATGGATTTGTCTTATAAATACCACCCTATGTTGCTGAACACCTCTCCAACCTCAAACAT 1798
DQ839406_ACS1G.1 ATGGATTTGTCTTATAAATACCACCCTATGTTGCTGAACACCTCTCCAACCTCAAACAT 1937
                *****

                TATA box

9930_ACS1     TCGAAGAACTATCTACCATATTTCCAACCAATACAAACCACCTCTTTTCTCTCTCTATT 1858
Gy14_ACS1     TCGAAGAACTATCTACCATATTTCCAACCAATACAAACCACCTCTTTTCTCTCTCTATT 1859
Gy14_ACS1G    TCGAAGAACTATCTACCATATTTCCAACCAATACAAACCACCTCTTTTCTCTCTCTATT 1858
DQ839406_ACS1G.1 TCGAAGAACTATCTACCATATTTCCAACCAATACAAACCACCTCTTTTCTCTCTCTATT 1997
                *****

                ACS1 transcription start/5' UTR (+1, 197 bp from ATG)

9930_ACS1     TCTATTTCTCAACATTTCTCTCAATCTCATAATCTTTTGTACCTATATACCTCACCTCAA 1918
Gy14_ACS1     TCTATTTCTCAACATTTCTCTCAATCTCATAATCTTTTGTACCTATATACCTCACCTCAA 1919
Gy14_ACS1G    TCTATTTCTCAACATTTCTCTCAATCTCATAATCTTTTGTACCTATATACCTCACCTCAA 1918
DQ839406_ACS1G.1 TCTATTTCTCAACATTTCTCTCAATCTCATAATCTTTTGTACCTATATACCTCACCTCAA 2057
                *****

```

9930\_ACS1 CATTAATCTTAATCTTAAATCATCAGATTCTTCTTCCATCCATCCCTAGGCTAGCTTAT 1978  
Gy14\_ACS1 CATTAATCTTAATCTTAAATCATCAGATTCTTCTTCCATCCATCCCTAGGCTAGCTTAT 1979  
Gy14\_ACS1G CATTAATCTTAATCTTAAATCATCAGATTCTTCTTCCATCCATCCCTAGGCTAGCTTAT 1978  
DQ839406\_ACS1G.1 CATTAATCTTAATCTTAAATCATCAGATTCTTCTTCCATCCATCCCTAGGCTAGCTTAT 2117  
\*\*\*\*\*

9930\_ACS1 TAGCAGCACAACCGAAGAAAAATGAAGATGCTTCCACAAAAGCCACGTGCAATTCCCA 2038  
Gy14\_ACS1 TAGCAGCACAACCGAAGAAAAATGAAGATGCTTCCACAAAAGCCACGTGCAATTCCCA 2038  
Gy14\_ACS1G TAGCAGCACAACCGAAGAAAAATGAAGATGCTTCCACAAAAGCCACGTGCAATTCCCA 2038  
DQ839406\_ACS1G.1 TAGCAGCACAACCGAAGAAAAATGAAGATGCTTCCACAAAAGCCACGTGCAATTCCCA 2177  
\*\*\*\*\*

**ACS1 CDS start (Exon 1, 147 bp)**

9930\_ACS1 CCGTCAAGATTCCCTCCTACTTCTTAGGATGGGAAGCTTATGAGAAAAACCCCTTTGATGA 2098  
Gy14\_ACS1 CCGTCAAGATTCCCTCCTACTTCTTAGGATGGGAAGCTTATGAGAAAAACCCCTTTGATGA 2098  
Gy14\_ACS1G CCGTCAAGATTCCCTCCTACTTCTTAGGATGGGAAGCTTATGAGAAAAACCCCTTTGATGA 2098  
DQ839406\_ACS1G.1 CCGTCAAGATTCCCTCCTACTTCTTAGGATGGGAAGCTTATGAGAAAAACCCCTTTGATGA 2237  
\*\*\*\*\*

9930\_ACS1 GACTTCTAATCCCAACGGCATCATTCAGATGGGTCTTGCCGAGAATCAA GTAATTATATA 2158  
Gy14\_ACS1 GACTTCTAATCCCAACGGCATCATTCAGATGGGTCTTGCCGAGAATCAA GTAATTATATA 2158  
Gy14\_ACS1G GACTTCTAATCCCAACGGCATCATTCAGATGGGTCTTGCCGAGAATCAA GTAATTATATA 2158  
DQ839406\_ACS1G.1 GACTTCTAATCCCAACGGCATCATTCAGATGGGTCTTGCCGAGAATCAA GTAATTATATA 2297  
\*\*\*\*\*

9930\_ACS1 TATTCTTCTCGTATATATATATGTATACAAAAAAATCACCATTTTTATGTTCTATTAA 2218  
Gy14\_ACS1 TATTCTTCTCGTATATATATATGTATACAAAAAAATCACCATTTTTATGTTCTATTAA 2218  
Gy14\_ACS1G TATTCTTCTCGTATATATATATGTATACAAAAAAATCACCATTTTTATGTTCTATTAA 2218  
DQ839406\_ACS1G.1 TATTCTTCTCGTATATATATATGTATACAAAAAAATCACCATTTTTATGTTCTATTAA 2357  
\*\*\*\*\*

9930\_ACS1 GAGCTCTATTACTCACCTTTTTTTTTTCACTTTTTTTTTCAGCTATCATTGATCTTCTT 2278  
Gy14\_ACS1 GAGCTCTATTACTCACCTTTTTTTTTTCACTTTTTTTTTCAGCTATCATTGATCTTCTT 2278  
Gy14\_ACS1G GAGCTCTATTACTCACCTTTTTTTTTTCACTTTTTTTTTCAGCTATCATTGATCTTCTT 2278  
DQ839406\_ACS1G.1 GAGCTCTATTACTCACCTTTTTTTTTTCACTTTTTTTTTCAGCTATCATTGATCTTCTT 2417  
\*\*\*\*\*

**ACS1 Exon 2 (291 bp)**

9930\_ACS1 GAATCATGGCTTACAAAAAATCCAGACGCAGCCAGCTTTAAACGTGATGGCAAATCAATT 2338  
Gy14\_ACS1 GAATCATGGCTTACAAAAAATCCAGACGCAGCCAGCTTTAAACGTGATGGCAAATCAATT 2338  
Gy14\_ACS1G GAATCATGGCTTACAAAAAATCCAGACGCAGCCAGCTTTAAACGTGATGGCAAATCAATT 2337  
DQ839406\_ACS1G.1 GAATCATGGCTTACAAAAAATCCAGACGCAGCCAGCTTTAAACGTGATGGCAAATCAATT 2477  
\*\*\*\*\*

9930\_ACS1 TTTAGAGAGCTCGCTCTCTTCCAAGATTACCACGGCTTACCCGCATTCAAAAAGGCATTG 2398  
Gy14\_ACS1 TTTAGAGAGCTCGCTCTCTTCCAAGATTACCACGGCTTACCCGCATTCAAAAAGGCATTG 2398  
Gy14\_ACS1G TTTAGAGAGCTCGCTCTCTTCCAAGATTACCACGGCTTACCCGCATTCAAAAAGGCATTG 2397  
DQ839406\_ACS1G.1 TTTAGAGAGCTCGCTCTCTTCCAAGATTACCACGGCTTACCCGCATTCAAAAAGGCATTG 2537  
\*\*\*\*\*

9930\_ACS1 GTAGAATTTATGGCGGAAATTAGAGGAAACAAAGTAACATTTGAAGCAAATAACATAGTC 2458  
Gy14\_ACS1 GTAGAATTTATGGCGGAAATTAGAGGAAACAAAGTAACATTTGAAGCAAATAACATAGTC 2458  
Gy14\_ACS1G GTAGAATTTATGGCGGAAATTAGAGGAAACAAAGTAACATTTGAAGCAAATAACATAGTC 2457  
DQ839406\_ACS1G.1 GTAGAATTTATGGCGGAAATTAGAGGAAACAAAGTAACATTTGAAGCAAATAACATAGTC 2597  
\*\*\*\*\*

9930\_ACS1 CTTACAGCTGGCGCTACATCAGCCAATGAAACACTTATGTTCTGCCTTGCAGAGGCTGGC 2518  
Gy14\_ACS1 CTTACAGCTGGCGCTACATCAGCCAATGAAACACTTATGTTCTGCCTTGCAGAGGCTGGC 2518  
Gy14\_ACS1G CTTACAGCTGGCGCTACATCAGCCAATGAAACACTTATGTTCTGCCTTGCAGAGGCTGGC 2517  
DQ839406\_ACS1G.1 CTTACAGCTGGCGCTACATCAGCCAATGAAACACTTATGTTCTGCCTTGCAGAGGCTGGC 2657  
\*\*\*\*\*

9930\_ACS1 GATGCCTTCTCCTCCCAACTCCA TACTATCCAGGGTTAGTAGTAATGATATTAATATTA 2578  
Gy14\_ACS1 GATGCCTTCTCCTCCCAACTCCATACTATCCAGGGTTAGTAGTAATGATATTAATATTA 2578  
Gy14\_ACS1G GATGCCTTCTCCTCCCAACTCCATACTATCCAGGGTTAGTAGTAATGATATTAATATTA 2577  
DQ839406\_ACS1G.1 GATGCCTTCTCCTCCCAACTCCATACTATCCAGGGTTAGTAGTAATGATATTAATATTA 2717  
\*\*\*\*\*

9930\_ACS1 ATTACTTTACATTCACCTTAAACTTAAACATTTCCCTTTACTATAAECTCAAGCTAAATAA 2638  
Gy14\_ACS1 ATTACTTTACATTCACCTTAAACTTAAACATTTCCCTTTACTATAAECTCAAGCTAAATAA 2638  
Gy14\_ACS1G ATTACTTTACATTCACCTTAAACTTAAACATTTCCCTTTACTATAAECTCAAGCTAAATAA 2637  
DQ839406\_ACS1G.1 ATTACTTTACATTCACCTTAAACTTAAACATTTCCCTTTACTATAAECTCAAGCTAAATAA 2777  
\*\*\*\*\*

9930\_ACS1 TTCTAATTAATCATGTATACTTTACTATAAACAGATTGATAGAGATTGAAATGGAGAA 2698  
Gy14\_ACS1 TTCTAATTAATCATGTATACTTTACTATAAACAGATTGATAGAGATTGAAATGGAGAA 2698  
Gy14\_ACS1G TTCTAATTAATCATGTATACTTTACTATAAACAGATTGATAGAGATTGAAATGGAGAA 2697  
DQ839406\_ACS1G.1 TTCTAATTAATCATGTATACTTTACTATAAACAGATTGATAGAGATTGAAATGGAGAA 2837  
\*\*\*\*\*  
**ACS1 Exon 3 (1005 bp)**  
9930\_ACS1 CCGGAGTTGAGATTGTGCCAATTCATTGCAGCTAGCTCCAACGGCTTCCAAGTACCCAAC 2758  
Gy14\_ACS1 CCGGAGTTGAGATTGTGCCAATTCATTGCAGCTAGCTCCAACGGCTTCCAAGTACCCAAC 2758  
Gy14\_ACS1G CCGGAGTTGAGATTGTGCCAATTCATTGCAGCTAGCTCCAACGGCTTCCAAGTACCCAAC 2757  
DQ839406\_ACS1G.1 CCGGAGTTGAGATTGTGCCAATTCATTGCAGCTAGCTCCAACGGCTTCCAAGTACCCAAC 2897  
\*\*\*\*\*  
9930\_ACS1 CAGCTTTAGAACAAGCCTATCAAGAAGCCCAAGCTCGCAACCTACGTGTCAAAGGCGTAT 2818  
Gy14\_ACS1 CAGCTTTAGAACAAGCCTATCAAGAAGCCCAAGCTCGCAACCTACGTGTCAAAGGCGTAT 2818  
Gy14\_ACS1G CAGCTTTAGAACAAGCCTATCAAGAAGCCCAAGCTCGCAACCTACGTGTCAAAGGCGTAT 2817  
DQ839406\_ACS1G.1 CAGCTTTAGAACAAGCCTATCAAGAAGCCCAAGCTCGCAACCTACGTGTCAAAGGCGTAT 2957  
\*\*\*\*\*  
9930\_ACS1 TGGTTACCAACCCATCTAACCATTGGGAACCAATGACAAGAAATGAACTCGACTTGG 2878  
Gy14\_ACS1 TGGTTACCAACCCATCTAACCATTGGGAACCAATGACAAGAAATGAACTCGACTTGG 2878  
Gy14\_ACS1G TGGTTACCAACCCATCTAACCATTGGGAACCAATGACAAGAAATGAACTCGACTTGG 2876  
DQ839406\_ACS1G.1 TGGTTACCAACCCATCTAACCATTGGGAACCAATGACAAGAAATGAACTCGACTTGG 3017  
\*\*\*\*\*  
9930\_ACS1 TTTTGTATTTTCATAACCTCCAAGGCATTTCATTGATCAGCGACGAGATTTACTCTGGGA 2938  
Gy14\_ACS1 TTTTGTATTTTCATAACCTCCAAGGCATTTCATTGATCAGCGACGAGATTTACTCTGGGA 2938  
Gy14\_ACS1G TTTTGTATTTTCATAACCTCCAAGGCATTTCATTGATCAGCGACGAGATTTACTCTGGGA 2936  
DQ839406\_ACS1G.1 TTTTGTATTTTCATAACCTCCAAGGCATTTCATTGATCAGCGACGAGATTTACTCTGGGA 3077  
\*\*\*\*\*  
9930\_ACS1 CCGTTTTTGGGTCTCCAGGATTTCGTGAGCGCCATGGAGGTGCTTAAGGAGAGGAGTAACG 2998  
Gy14\_ACS1 CCGTTTTTGGGTCTCCAGGATTTCGTGAGCGCCATGGAGGTGCTTAAGGAGAGGAGTAACG 2998  
Gy14\_ACS1G CCGTTTTTGGGTCTCCAGGATTTCGTGAGCGCCATGGAGGTGCTTAAGGAGAGGAGTAACG 2996  
DQ839406\_ACS1G.1 CCGTTTTTGGGTCTCCAGGATTTCGTGAGCGCCATGGAGGTGCTTAAGGAGAGGAGTAACG 3137  
\*\*\*\*\*  
9930\_ACS1 AAGACGAGGAAGTTTGGGAAGAGAGTTTCATATTGTTTACAGTTTATCAAAGGATTTAGGGC 3058  
Gy14\_ACS1 AAGACGAGGAAGTTTGGGAAGAGAGTTTCATATTGTTTACAGTTTATCAAAGGATTTAGGGC 3058  
Gy14\_ACS1G AAGACGAGGAAGTTTGGGAAGAGAGTTTCATATTGTTTACAGTTTATCAAAGGATTTAGGGC 3056  
DQ839406\_ACS1G.1 AAGACGAGGAAGTTTGGGAAGAGAGTTTCATATTGTTTACAGTTTATCAAAGGATTTAGGGC 3197  
\*\*\*\*\*  
9930\_ACS1 TCCCAGGTTTTTCGAGTTGGTGCAATTTACTCTAATGATGAAATGGTCGTGGCGGTGCTA 3118  
Gy14\_ACS1 TCCCAGGTTTTTCGAGTTGGTGCAATTTACTCTAATGATGAAATGGTCGTGGCGGTGCTA 3118  
Gy14\_ACS1G TCCCAGGTTTTTCGAGTTGGTGCAATTTACTCTAATGATGAAATGGTCGTGGCGGTGCTA 3116  
DQ839406\_ACS1G.1 TCCCAGGTTTTTCGAGTTGGTGCAATTTACTCTAATGATGAAATGGTCGTGGCGGTGCTA 3257  
\*\*\*\*\*  
9930\_ACS1 CTAAAATGTCTAGCTTTGGGTTGGTGTCATCTCAAACACAATATCTTCTTTCAGCTATGC 3178  
Gy14\_ACS1 CTAAAATGTCTAGCTTTGGGTTGGTGTCATCTCAAACACAATATCTTCTTTCAGCTATGC 3178  
Gy14\_ACS1G CTAAAATGTCTAGCTTTGGGTTGGTGTCATCTCAAACACAATATCTTCTTTCAGCTATGC 3176  
DQ839406\_ACS1G.1 CTAAAATGTCTAGCTTTGGGTTGGTGTCATCTCAAACACAATATCTTCTTTCAGCTATGC 3317  
\*\*\*\*\*  
9930\_ACS1 TATCCGACAAGAAATTTACGAGAACCTATATTTCTGAGAATCAAAGAGGTTGAAACAAA 3238  
Gy14\_ACS1 TATCCGACAAGAAATTTACGAGAACCTATATTTCTGAGAATCAAAGAGGTTGAAACAAA 3238  
Gy14\_ACS1G TATCCGACAAGAAATTTACGAGAACCTATATTTCTGAGAATCAAAGAGGTTGAAAC-AA 3235  
DQ839406\_ACS1G.1 TATCCGACAAGAAATTTACGAGAACCTATATTTCTGAGAATCAAAGAGGTTGAAACAAA 3377  
\*\*\*\*\*  
9930\_ACS1 GACAGAAAATGTTGGTGAGTGGATTAGAGAAGGCTGGGATTAAGTGTGGGAGAGTAATG 3298  
Gy14\_ACS1 GACAGAAAATGTTGGTGAGTGGATTAGAGAAGGCTGGGATTAAGTGTGGGAGAGTAATG 3298  
Gy14\_ACS1G GACAGAAAATGTTGGTGAGTGGATTAGAGAAGGCTGGGATTAAGTGTGGGAGAGTAATG 3295  
DQ839406\_ACS1G.1 GACAGAAAATGTTGGTGAGTGGATTAGAGAAGGCTGGGATTAAGTGTGGGAGAGTAATG 3437  
\*\*\*\*\*  
9930\_ACS1 CTGGGTTGTTTTGTTGGGTTGATATGAGGCATTTGTTGGAATCAGATACGTTTGAATGTG 3358  
Gy14\_ACS1 CTGGGTTGTTTTGTTGGGTTGATATGAGGCATTTGTTGGAATCAGATACGTTTGAATGTG 3358  
Gy14\_ACS1G CTGGGTTGTTTTGTTGGGTTGATATGAGGCATTTGTTGGAATCAGATACGTTTGAATGTG 3354  
DQ839406\_ACS1G.1 CTGGGTTGTTTTGTTGGGTTGATATGAGGCATTTGTTGGAATCAGATACGTTTGAATGTG 3497  
\*\*\*\*\*



9930\_ACS1 AATTAAAGCTATGGAAGAAGATTGTTTACGAAGTGGGTTTGAATATTTACCAGGATCAT 3418  
Gy14\_ACS1 AATTAAAGCTATGGAAGAAGATTGTTTACGAAGTGGGTTTGAATATTTACCAGGATCAT 3418  
Gy14\_ACS1G AATTAAAGCTATGGAAGAAGATTGTTTACGAAGTGGGTTTGAATATTTACCAGGATCAT 3413  
DQ839406\_ACS1G.1 AATTAAAGCTATGGAAGAAGATTGTTTACGAAGTGGGTTTGAATATTTACCAGGATCAT 3557  
\*\*\*\*\*

9930\_ACS1 CTTGTCATTGCACTGAACCAGGCTGGTTTCGTGTTTGTGTTTGTGCTAATATGTCACAATCAA 3478  
Gy14\_ACS1 CTTGTCATTGCACTGAACCAGGCTGGTTTCGTGTTTGTGTTTGTGCTAATATGTCACAATCAA 3478  
Gy14\_ACS1G CTTGTCATTGCACTGAACCAGGCTGGTTTCGTGTTTGTGTTTGTGCTAATATGTCACAATCAA 3473  
DQ839406\_ACS1G.1 CTTGTCATTGCACTGAACCAGGCTGGTTTCGTGTTTGTGTTTGTGCTAATATGTCACAATCAA 3617  
\*\*\*\*\*

9930\_ACS1 CCTTGAAACTCGTATCCGAAGATTGAAGTCGTTTGTTCGAAGAATTGAGATCCGTTTCTA 3538  
Gy14\_ACS1 CCTTGAAACTCGTATCCGAAGATTGAAGTCGTTTGTTCGAAGAATTGAGATCCGTTTCTA 3538  
Gy14\_ACS1G CCTTGAAACTCGTATCCGAAGATTGAAGTCGTTTGTTCGAAGAATTGAGATCCGTTTCTA 3533  
DQ839406\_ACS1G.1 CCTTGAAACTCGTATCCGAAGATTGAAGTCGTTTGTTCGAAGAATTGAGATCCGTTTCTA 3677  
\*\*\*\*\*

9930\_ACS1 CACCGAACGTTTCCACTACCCTACAAATATTCATGACAGCAAATTTTCCAAGAATATCA 3598  
Gy14\_ACS1 CACCGAACGTTTCCACTACCCTACAAATATTCATGACAGCAAATTTTCCAAGAATATCA 3598  
Gy14\_ACS1G CACCGAACGTTTCCACTACCCTACAAATATTCATGACAGCAAATTTTCCAAGAATATCA 3593  
DQ839406\_ACS1G.1 CACCGAACGTTTCCACTACCCTACAAATATTCATGACAGCAAATTTTCCAAGAATATCA 3737  
\*\*\*\*\*

9930\_ACS1 AGAAAAATATTTTACCACCAATGGGTTTTCCGGCAATCGGTTCAAGATCAAGCCAACCGCA 3658  
Gy14\_ACS1 AGAAAAATATTTTACCACCAATGGGTTTTCCGGCAATCGGTTCAAGATCAAGCCAACCGCA 3658  
Gy14\_ACS1G AGAAAAATATTTTACCACCAATGGGTTTTCCGGCAATCGGTTCAAGATCAAGCCAACCGCA 3653  
DQ839406\_ACS1G.1 AGAAAAATATTTTACCACCAATGGGTTTTCCGGCAATCGGTTCAAGATCAAGCCAACCGCA 3797  
\*\*\*\*\*

9930\_ACS1 AGCTCCATTATGAACGATAGCCTGGTTTTTTTTTTTTTTTTTACTCATCATCCATATTTGGG 3717  
Gy14\_ACS1 AGCTCCATTATGAACGATAGCCTGGTTTTTTTTTTTTTTTTTACTCATCATCCATATTTGGG 3718  
Gy14\_ACS1G AGCTCCATTATGAACGATAGCCTGGTTTTTTTTTTTTTTTTTACTCATCATCCATATTTGGG 3712  
DQ839406\_ACS1G.1 AGCTCCATTATGAACGATAGCCTGGTTTTTTTTTTTTTTTTTACTCATCATCCATATTTGGG 3857  
\*\*\*\*\*

**Translation stop codon**

9930\_ACS1 GGAATTTTTTTTTCTTAATCTTGTTGAAATATTCCAAATTTAGAATTTTCATATTTGTAAT 3777  
Gy14\_ACS1 GGAATTTTTTTTTCTTAATCTTGTTGAAATATTCCAAATTTAGAATTTTCATATTTGTAAT 3778  
Gy14\_ACS1G GGAATTTTTTTTTCTTAATCTTGTTGAAATATTCCAAATTTAGAATTTTCATATTTGTAAT 3772  
DQ839406\_ACS1G.1 GGAATTTTTTTTTCTTAATCTTGTTGAAATATTCCAAATTTAGAATTTTCATATTTGTAAT 3917  
\*\*\*\*\*

9930\_ACS1 TAGAGAAAAAAGAAAAAGAAAAGTGCCTCGGTCATTGTGGGATTAGTAGTGGCTTTA 3837  
Gy14\_ACS1 TAGAGAAAAAAGAAAAAGAAAAGTGCCTCGGTCATTGTGGGATTAGTAGTGGCTTTA 3838  
Gy14\_ACS1G TAGAGAAAAAAGAAAAAGAAAAGTGCCTCGGTCATTGTGGGATTAGTAGTGGCTTTA 3832  
DQ839406\_ACS1G.1 TAGAGAAAAAAGAAAAAGAAAAGTGCCTCGGTCATTGTGGGATTAGTAGTGGCTTTA 3977  
\*\*\*\*\*

9930\_ACS1 ATTAATTAATTAATTAATTATTAATCTTTTTTTCATTAATCTGATTCTCTCTCTCTC 3897  
Gy14\_ACS1 ATTAATTAATTAATTAATTATTAATCTTTTTTTCATTAATCTGATTCTCTCTCTCTC 3898  
Gy14\_ACS1G ATTAATTAATTAATTAATTATTAATCTTTTTTTCATTAATCTGATTCTCTCTCTCTC 3891  
DQ839406\_ACS1G.1 ATTAATTAATTAATTAATTATTAATCTTTTTTTCATTAATCTGATTCTCTCTCTCTC 4037  
\*\*\*\*\*

mRNA transcript end

9930\_ACS1 TCTCTCTCTCTCTCTCTCTAATCAGAAATATTTAATGAAGTATATTAGAATCGAATGA 3957  
Gy14\_ACS1 TCTCTCTCTCTCTCTCTCTAATCAGAAATATTTAATGAAGTATATTAGAATCGAATGA 3958  
Gy14\_ACS1G TCTCTCTCTCTCTCTCTCTAATCAGAAATATTTAATGAAGTATATTAGAATCGAATGA 3951  
DQ839406\_ACS1G.1 TCTCTCTCTCTCTCTCTCTAATCAGAAATATTTAATGAAGTATATTAGAATCGAATGA 4097  
\*\*\*\*\*

9930\_ACS1 ATTTTCCAACGTGGAGGATTTTATGCGAGATGTTATCATGTGTTGAAACGATAATGGTTG 4017  
Gy14\_ACS1 ATTTTCCAACGTGGAGGATTTTATGCGAGATGTTATCATGTGTTGAAACGATAATGGTTG 4018  
Gy14\_ACS1G ATTTTCCAACGTGGAGGATTTTATGCGAGATGTTATCATGTGTTGAAACGATAATGGTTG 4011  
DQ839406\_ACS1G.1 ATTTTCCAACGTGGAGGATTTTATGCGAGATGTTATCATGTGTTGAAACGATAATGGTTG 4157  
\*\*\*\*\*

9930\_ACS1 GCCATGTGAGAAGATTTTATTTATTAATCAATTATTATTATTATTATTATTATTATTATTGTTAATGT 4077  
Gy14\_ACS1 GCCATGTGAGAAGATTTTATTTATTAATCAATTATTATTATTATTATTATTATTATTATTATTGTTAATGT 4078  
Gy14\_ACS1G GCCATGTGAGAAGATTTTATTTATTAATCAATTATTATTATTATTATTATTATTATTATTATTATTGTTAATGT 4071  
DQ839406\_ACS1G.1 GCCATGTGAGAAGATTTTATTTATTAATCAATTATTATTATTATTATTATTATTATTATTATTGTTAATGT 4217  
\*\*\*\*\*

|                  |                                                                |      |
|------------------|----------------------------------------------------------------|------|
| 9930_ACS1        | ATAGAGAAAATAATAATAATAATAATATAGAAAAGAGATGGCTTGCAAAGTGAAACGGCGC  | 4137 |
| Gy14_ACS1        | ATAGAGAAAATAATAATAATAATAATATAGAAAAGAGATGGCTTGCAAAGTGAAACGGCGC  | 4138 |
| Gy14_ACS1G       | ATAGAGAAAATAATAATAATAATAATATAGAAAAGAGATGGCTTGCAAAGTGAAACGGCGC  | 4131 |
| DQ839406_ACS1G.1 | ATAGAGAAAATAATAATAATAATAATATAGAAAAGAGATGGCTTGCAAAGTGAAACGGCGC  | 4277 |
| *****            |                                                                |      |
| 9930_ACS1        | CGTTGGCGAGAATAGCGGCTGAAAGACGGTGGGTTTTT-TTTTTAATAGTAAGAAGATGT   | 4196 |
| Gy14_ACS1        | CGTTGGCGAGAATAGCGGCTGAAAGACGGTGGGTTTTTTTTTTTTAATAGTAAGAAGATGT  | 4198 |
| Gy14_ACS1G       | CGTTGGCGAGAATAGCGC-TGAAAGACGGTGGTTTTT-TTTTTAATAGTAAGAAGATGT    | 4189 |
| DQ839406_ACS1G.1 | CGTTGGCGAGAATAGCGGCTGAAAGACGGTGGGTTTT-TTTTTAATAGTAAGAAGATGT    | 4336 |
| *****            |                                                                |      |
| 9930_ACS1        | GCCGACATGAACCGGTTAATTTGGTTGAGTCATTGGTTACCCAACCGAAACCGACCTCT    | 4256 |
| Gy14_ACS1        | GCCGACATGAACCGGTTAATTTGGTTGAGTCATTGGTTACCCAACCGAAACCGACCTCT    | 4258 |
| Gy14_ACS1G       | GCCGACATGAACCGGTTAATTTGGTTGAGTCATTGGTTACCCAACCGAAACCGACCTCT    | 4249 |
| DQ839406_ACS1G.1 | GCCGACATGAACCGGTTAATTTGGTTGAGTCATTGGTTACCCAACCGAAACCGACCTCT    | 4396 |
| *****            |                                                                |      |
| 9930_ACS1        | TTCTTTCACACAAAACCCAAATACACAAATAATAATAATAAAGTGTGTGATTTTAAGC     | 4316 |
| Gy14_ACS1        | TTCTTTCACACAAAACCCAAATACACAAATAATAATAATAAAGTGTGTGATTTTAAGC     | 4318 |
| Gy14_ACS1G       | TTCTTTCACACAAAACCCAAATACACAAATAATAATAAT-ATAAGTGTGTGATTTTAAGC   | 4308 |
| DQ839406_ACS1G.1 | TTCTTTCACACAAAACCCAAATACACAAATAATAATAATAAAGTGTGTGATTTTAAGC     | 4456 |
| *****            |                                                                |      |
| 9930_ACS1        | AATTTGTGTGTTGTGTTGTACAGCAAAAAGAAGGCCAATCCCAAGTGGGTTGTTGGTCAGA  | 4376 |
| Gy14_ACS1        | AATTTGTGTGTTGTGTTGTACAGCAAAAAGAAGGCCAATCCCAAGTGGGTTGTTGGTCAGA  | 4378 |
| Gy14_ACS1G       | AATTTGTGTGTTGTGTTGTACAGCAAAAAGAAGGCCAATCCCAAGT-GGTTGTTGGTCAGA  | 4367 |
| DQ839406_ACS1G.1 | AATTTGTGTGTTGTGTTGTACAGCAAAAAGAAGGCCAATCCCAAGTGGGTTGTTGGTCAGA  | 4516 |
| *****            |                                                                |      |
| 9930_ACS1        | ATAGCCGAAGACAGTCAAACCTATTACGTTTGCCTAGGCCCTCCAAGAATCAAACCTTTGTC | 4436 |
| Gy14_ACS1        | ATAGCCGAAGACAGTCAAACCTATTACGTTTGCCTAGGCCCTCCAAGAATCAAACCTTTGTC | 4438 |
| Gy14_ACS1G       | ATAGCCGAAGACAGTCAAACCTATTACGTTTGCCTAGGCCCTCCAAGAATCAAACCTTTGTC | 4427 |
| DQ839406_ACS1G.1 | ATAGCCGAAGACAGTCAAACCTATTACGTTTGCCTAGGCCCTCCAAGAATCAAACCTTTGTC | 4576 |
| *****            |                                                                |      |
| 9930_ACS1        | CCCATTTCAACATTTCAACATTTCTTTTCTATTTTTTTTTTTCCTTTTCGTTAACCTATA   | 4496 |
| Gy14_ACS1        | CCCATTTCAACATTTCAACATTTCTTTTCTATTTTTTTTTTTCCTTTTCGTTAACCTATA   | 4498 |
| Gy14_ACS1G       | CCCATTTCAACATTTCAACATTTCTTTTCTATTTTT-TTTTTCCTTTTCGTTAACCTATA   | 4486 |
| DQ839406_ACS1G.1 | CCCATTTCAACATTTCAACATTTCTTTTCTATTTTTTTTTTTCCTTTTCGTTAACCTATA   | 4636 |
| *****            |                                                                |      |
| 9930_ACS1        | TATAAAATCTCACTCTTTTTTATTTTCTTTTAAACCATTTTAAATTAACCTAATCAAAAT   | 4556 |
| Gy14_ACS1        | TATAAAATCTCACTCTTTTTTATTTTCTTTTAAACCATTTTAAATTAACCTAATCAAAAT   | 4558 |
| Gy14_ACS1G       | TATAAAATCTCACTCTTTTTTATTTTCTTTTAAACCATTTTAAATTAACCTAATCAAAAT   | 4546 |
| DQ839406_ACS1G.1 | TATAAAATCTCACTCTTTTTTATTTTCTTTTAAACCATTTTAAATTAACCTAATCAAAAT   | 4696 |
| *****            |                                                                |      |
| 9930_ACS1        | TATTGGATATTATTGATCTCACATGACGATGCTTCTTCAAATTGCTTTATAAAAATTATG   | 4616 |
| Gy14_ACS1        | TATTGGATATTATTGATCTCACATGACGATGCTTCTTCAAATTGCTTTATAAAAATTATG   | 4618 |
| Gy14_ACS1G       | TAT-TGATATTATTGATCTCACATGACGATGCTTCTTCAAATTGCTTTATAAAAATTATG   | 4605 |
| DQ839406_ACS1G.1 | TATTGGATATTATTGATCTCACATGACGATGCTTCTTCAAATTGCTTTATAAAAATTATG   | 4756 |
| *** *****        |                                                                |      |
| 9930_ACS1        | ACATTAATTATATATAGGATAAATCCAAAAATAATTGAGTCAAAGTATTAAATTAACCT    | 4676 |
| Gy14_ACS1        | ACATTAATTATATATAGGATAAATCCAAAAATAATTGAGTCAAAGTATTAAATTAACCT    | 4678 |
| Gy14_ACS1G       | ACATTAATTATATATAGGATAAATCCAAAAATAATTGAGTCAAAGTATTAAATTAACCT    | 4665 |
| DQ839406_ACS1G.1 | ACATTAATTATATATAGGATAAATCCAAAAATAATTGAGTCAAAGTATTAAATTAACCT    | 4816 |
| *****            |                                                                |      |
| 9930_ACS1        | TT-----                                                        | 4678 |
| Gy14_ACS1        | -----                                                          | 4678 |
| Gy14_ACS1G       | TTGTCTTT-----                                                  | 4673 |
| DQ839406_ACS1G.1 | TTGTCTTTATTTTACTT                                              | 4833 |

**Supplementary File 5 (Table S2). Sex expression of the cucumber materials used in this study.**

| #  | Accessions        | Sex expression* | Objectives           |
|----|-------------------|-----------------|----------------------|
| 1  | WI2757            | G               | G01 (Fig. 3)         |
| 2  | 2A                | G               | G02 (Fig. 3)         |
| 3  | NZ1               | G               | G03 (Fig. 3)         |
| 4  | GP5818            | G               | G04 (Fig. 3)         |
| 5  | Gy14              | G               | G05 (Fig. 3)         |
| 6  | PI 308915         | G               | G06 (Fig. 3)         |
| 7  | 1351A1            | G               | G07 (Fig. 3)         |
| 8  | 7155B             | G               | G08 (Fig. 3)         |
| 9  | BA-m10-139        | G               | G09 (Fig. 3)         |
| 10 | ZS0806            | G               | G10 (Fig. 3)         |
| 11 | ZS0833            | G               | G11 (Fig. 3)         |
| 12 | DP1               | G               | G12 (Fig. 3)         |
| 13 | MSU 713-5         | G               | G13 (Fig. 3)         |
| 14 | AM297             | G               | G14 (Fig. 3)         |
| 15 | PI 292012         | H               | H01 (Fig. 3)         |
| 16 | PI 356809         | H               | H02 (Fig. 3)         |
| 17 | PI 370643         | H               | H03 (Fig. 3)         |
| 18 | PI 500365         | H               | H04 (Fig. 3)         |
| 19 | WI1983H           | H               | H05 (Fig. 3)         |
| 20 | WI7012A           | M               | M01 (Fig. 3)         |
| 21 | Midget            | M               | M02 (Fig. 3)         |
| 22 | PI 267942         | M               | M03 (Fig. 3)         |
| 23 | PI 271327         | M               | M04 (Fig. 3)         |
| 24 | PI 271328         | M               | M05 (Fig. 3)         |
| 25 | SV4719S-M         | M               | M07 (Fig. 3)         |
| 26 | Northern Pickling | M               | M08 (Fig. 3)         |
| 27 | Gy14*WI7284 F1    | SubG            | SubG01 (Fig. 3)      |
| 28 | Gy14*AM056 F1     | SubG            | SubG02 (Fig. 3)      |
| 29 | AM007 x AM001 F1  | SubG            | SubG03 (Fig. 3)      |
| 30 | Gy14M-17          | M               | CNV UCO, qPCR        |
| 31 | Gy14M-42          | M               | CNV UCO, qPCR        |
| 32 | Gy14M-63          | M               | CNV UCO, qPCR        |
| 33 | 9930              | M               | Reference            |
| 34 | PI 183967         | M               | CNV, reads alignment |
| 35 | PI 197088         | M               | CNV, reads alignment |
| 36 | WI7167            | M               | CNV, reads alignment |
| 37 | G421              | G               | CNV, reads alignment |

\* From 2014 and 2015 field data. A = andromonoecious; G = gynoecious, M = monoecious, H = hermaphrodite.

Supplementary File 6 (Table S3). Nucleotide diversity at the 50 kb *F* locus (*CsACS1G*) among 48 cucumber varieties.

| Serial # | PI or CGN # | Accession names                | Sex expression | Botanical groups                 | Origin of accessions | Haplotypes* |            |            |            |            |            |            |            |            |            |            |            |            |            |            |            |            |            |            |            |
|----------|-------------|--------------------------------|----------------|----------------------------------|----------------------|-------------|------------|------------|------------|------------|------------|------------|------------|------------|------------|------------|------------|------------|------------|------------|------------|------------|------------|------------|------------|
|          |             |                                |                |                                  |                      | 24,207,363  | 24,207,424 | 24,207,547 | 24,207,976 | 24,208,099 | 24,208,574 | 24,209,013 | 24,209,048 | 24,209,091 | 24,209,317 | 24,209,361 | 24,209,584 | 24,211,499 | 24,211,585 | 24,216,268 | 24,218,009 | 24,218,987 | 24,220,561 | 24,221,073 | 24,221,548 |
| 1        | CGN19579    | 1972B-2                        | G              | <i>Cs. var. sativus</i>          | United States        | T           | G          | A          | A          | G          | C          | C          | C          | G          | C          | T          | C          | C          | A          | C          | A          | T          | T          | C          | T          |
| 2        | CGN19677    | M5                             | G              | <i>Cs. var. sativus</i>          | Netherlands          | T           | G          | A          | A          | G          | C          | C          | C          | G          | C          | T          | C          | C          | A          | C          | A          | T          | T          | C          | T          |
| 3        | CGN19844    | 2163                           | G              | <i>Cs. var. sativus</i>          | United States        | T           | G          | A          | A          | G          | C          | C          | C          | G          | C          | T          | C          | C          | A          | C          | A          | T          | T          | C          | T          |
| 4        | CGN20515    | Gy3(S4)                        | G              | <i>Cs. var. sativus</i>          | Poland               | T           | G          | A          | A          | G          | T          | C          | C          | G          | C          | T          | C          | C          | A          | C          | A          | T          | T          | C          | T          |
| 5        | G421        | G421                           | G              | <i>Cs. var. sativus</i>          | United States        | T           | G          | A          | A          | G          | T          | C          | C          | G          | C          | T          | C          | C          | A          | C          | A          | T          | T          | C          | A          |
| 6        | G8          | G8                             | G              | <i>Cs. var. sativus</i>          | United States        | T           | G          | A          | A          | G          | T          | C          | C          | G          | C          | T          | C          | C          | A          | C          | A          | T          | T          | C          | T          |
| 7        | Gy14        | Gy14                           | G              | <i>Cs. var. sativus</i>          | United States        | T           | G          | A          | A          | G          | T          | C          | C          | G          | C          | T          | C          | C          | A          | C          | A          | T          | T          | C          | T          |
| 8        | NP1         | NP1                            | G              | <i>Cs. var. sativus</i>          | United States        | T           | G          | A          | A          | G          | T          | C          | C          | G          | C          | T          | C          | C          | A          | C          | A          | T          | T          | C          | A          |
| 9        | P1          | P1                             | G              | <i>Cs. var. sativus</i>          | United States        | T           | G          | A          | A          | G          | T          | C          | C          | G          | C          | T          | C          | C          | A          | C          | A          | T          | T          | C          | A          |
| 10       | W12757      | W12757                         | G              | <i>Cs. var. sativus</i>          | United States        | T           | G          | A          | A          | G          | T          | C          | C          | G          | C          | T          | C          | C          | A          | C          | A          | T          | T          | C          | A          |
| 11       | PI 221440   | Khair; Badreng-i-Savareh       | M              | <i>Cs. var. sativus</i>          | Afghanistan          | T           | G          | A          | A          | G          | C          | C          | C          | G          | C          | T          | C          | C          | A          | C          | A          | T          | T          | C          | A          |
| 12       | CGN20243    | Cus12471                       | M              | <i>Cs. var. sativus</i>          | China                | T           | G          | A          | A          | G          | T          | C          | C          | G          | C          | T          | C          | C          | A          | C          | A          | T          | T          | C          | T          |
| 13       | V05A0522    | Huang Gua                      | M              | <i>Cs. var. sativus</i>          | China                | T           | G          | A          | A          | G          | T          | C          | C          | G          | C          | T          | C          | C          | A          | C          | A          | T          | T          | C          | T          |
| 14       | V05A0552    | Qing Dao Qiu Ye Er San         | M              | <i>Cs. var. sativus</i>          | China                | T           | G          | A          | A          | G          | T          | C          | C          | G          | C          | T          | C          | C          | A          | C          | A          | T          | T          | C          | T          |
| 15       | V05A0985    | Ye San Bai                     | M              | <i>Cs. var. sativus</i>          | China                | T           | G          | A          | A          | G          | T          | C          | C          | A          | C          | T          | C          | C          | A          | C          | A          | T          | T          | C          | A          |
| 16       | V05A1115    | Qian Qi Li Huang Gua           | M              | <i>Cs. var. sativus</i>          | China                | T           | G          | A          | A          | G          | T          | C          | C          | G          | C          | T          | C          | C          | A          | C          | A          | T          | T          | C          | T          |
| 17       | CG9142      | Ban Na Huang Gua 12            | M              | <i>Cs. var. xishuangbanensis</i> | China, Yunnan        | T           | G          | A          | A          | G          | C          | C          | C          | G          | C          | T          | C          | C          | A          | C          | A          | T          | T          | C          | A          |
| 18       | CG9153      | Bai Chang Yuan Huang Gua       | M              | <i>Cs. var. xishuangbanensis</i> | China, Yunnan        | T           | G          | A          | A          | G          | C          | C          | C          | G          | C          | T          | C          | C          | A          | C          | A          | T          | T          | C          | T          |
| 19       | CG9164      | Yuan Bai Huang Gua             | M              | <i>Cs. var. xishuangbanensis</i> | China, Yunnan        | T           | G          | A          | A          | G          | C          | C          | C          | G          | C          | T          | C          | C          | A          | C          | A          | T          | T          | C          | T          |
| 20       | CG9169      | Yuan Duan Huang Pi             | M              | <i>Cs. var. xishuangbanensis</i> | China, Yunnan        | T           | G          | A          | A          | G          | C          | C          | C          | G          | C          | T          | C          | C          | A          | C          | A          | T          | T          | C          | T          |
| 21       | CG9185      | Ban Na Huang Gua 51            | M              | <i>Cs. var. xishuangbanensis</i> | China, Yunnan        | T           | G          | A          | A          | G          | C          | C          | C          | G          | C          | T          | C          | C          | A          | C          | A          | T          | T          | C          | T          |
| 22       | PI 288995   | Nemet Kigyo                    | M              | <i>Cs. var. sativus</i>          | Hungary              | T           | G          | A          | A          | G          | C          | C          | C          | G          | C          | T          | C          | C          | A          | C          | A          | T          | T          | C          | T          |
| 23       | PI 326594   | Keeskeneti Hamvas              | M              | <i>Cs. var. sativus</i>          | Hungary              | T           | G          | A          | A          | G          | C          | C          | C          | G          | C          | T          | C          | C          | A          | C          | A          | T          | T          | C          | T          |
| 24       | 13598       | 13598                          | M              | <i>Cs. var. hardwickii</i>       | India                | C           | A          | G          | G          | T          | T          | T          | T          | A          | T          | T          | C          | C          | A          | C          | A          | T          | T          | C          | T          |
| 25       | CUS 233     | CUS 233                        | M              | <i>Cs. var. hardwickii</i>       | India                | C           | A          | G          | G          | T          | T          | T          | T          | A          | T          | T          | C          | T          | T          | C          | A          | T          | T          | C          | T          |
| 26       | Hw 2        | Hw 2                           | M              | <i>Cs. var. hardwickii</i>       | India                | C           | A          | G          | G          | T          | T          | T          | T          | A          | T          | T          | C          | C          | A          | C          | A          | T          | T          | C          | A          |
| 27       | Hw 5        | Hw 5                           | M              | <i>Cs. var. hardwickii</i>       | India                | C           | A          | G          | G          | T          | T          | T          | T          | A          | T          | T          | C          | C          | A          | C          | A          | T          | T          | C          | T          |
| 28       | LJ90430     | LJ 90430                       | M              | <i>Cs. var. hardwickii</i>       | India                | C           | A          | G          | G          | T          | T          | T          | T          | C          | T          | T          | C          | C          | A          | C          | A          | T          | T          | C          | T          |
| 29       | PI 504564   | VIR 3147                       | M              | <i>Cs. var. hardwickii</i>       | India                | C           | A          | G          | G          | T          | T          | T          | T          | C          | T          | T          | C          | C          | A          | C          | A          | T          | T          | C          | T          |
| 30       | PI 605988   | USM 411                        | M              | <i>Cs. var. sativus</i>          | India                | C           | A          | G          | G          | T          | C          | T          | T          | G          | T          | A          | C          | T          | A          | C          | A          | T          | T          | C          | A          |
| 31       | PI 606033   | Poona Kheera                   | M              | <i>Cs. var. sativus</i>          | India                | C           | A          | G          | G          | T          | T          | T          | T          | G          | T          | T          | C          | C          | A          | C          | A          | T          | T          | C          | A          |
| 32       | VIR 3147    | VIR 3147                       | M              | <i>Cs. var. hardwickii</i>       | India                | C           | A          | G          | G          | T          | T          | T          | T          | C          | T          | T          | C          | C          | A          | C          | A          | T          | T          | C          | T          |
| 33       | CG3010      | Sagami Hanpaku Fushinari Kyuri | M              | <i>Cs. var. sativus</i>          | Japan                | C           | A          | G          | G          | T          | T          | T          | T          | A          | T          | A          | T          | T          | T          | G          | G          | A          | T          | G          | A          |
| 34       | CGN19828    | CGN19828                       | M              | <i>Cs. var. sativus</i>          | Japan                | C           | A          | G          | G          | T          | T          | T          | T          | A          | T          | A          | T          | T          | T          | G          | G          | A          | T          | G          | T          |
| 35       | CGN20854    | Aonaga Suyo Kyuri              | M              | <i>Cs. var. sativus</i>          | Japan                | C           | A          | G          | G          | T          | T          | T          | T          | A          | T          | A          | T          | T          | T          | G          | G          | A          | A          | G          | T          |
| 36       | PI 267942   | Sekino No. 2 (Ochiai No.2)     | M              | <i>Cs. var. sativus</i>          | Japan                | C           | A          | G          | G          | T          | T          | T          | T          | A          | T          | A          | T          | T          | T          | G          | G          | A          | A          | G          | A          |
| 37       | PI 504563   | Tsuda                          | M              | <i>Cs. var. sativus</i>          | Japan                | C           | A          | G          | G          | T          | T          | T          | T          | A          | T          | A          | T          | T          | T          | G          | G          | A          | A          | G          | A          |
| 38       | CGN20512    | 752                            | M              | <i>Cs. var. sativus</i>          | Netherlands          | T           | G          | A          | A          | G          | C          | C          | C          | G          | C          | T          | C          | C          | A          | C          | A          | T          | T          | C          | T          |
| 39       | PI 263047   | Altaiisky Ranny                | M              | <i>Cs. var. sativus</i>          | Russia               | T           | G          | A          | A          | G          | C          | C          | C          | G          | C          | T          | C          | C          | A          | C          | A          | T          | T          | C          | A          |
| 40       | PI 512596   | Ac-3                           | M              | <i>Cs. var. sativus</i>          | Spain                | T           | G          | A          | A          | G          | C          | C          | C          | G          | C          | T          | C          | C          | A          | C          | A          | T          | T          | C          | T          |
| 41       | PI 338236   | Ames 1208                      | M              | <i>Cs. var. sativus</i>          | Turkey               | T           | G          | A          | A          | G          | C          | C          | C          | G          | C          | T          | C          | C          | A          | C          | A          | T          | T          | C          | A          |
| 42       | CGN19655    | SC 53-B (6)                    | M              | <i>Cs. var. sativus</i>          | United States        | T           | G          | A          | A          | G          | C          | C          | C          | G          | C          | T          | C          | C          | A          | C          | A          | T          | T          | C          | T          |
| 43       | CGN21626    | National Pickle                | M              | <i>Cs. var. sativus</i>          | United States        | T           | G          | A          | A          | G          | C          | C          | C          | G          | C          | T          | C          | C          | A          | C          | A          | T          | T          | C          | T          |
| 44       | CGN21627    | Spartan Garden                 | M              | <i>Cs. var. sativus</i>          | United States        | T           | G          | A          | A          | G          | C          | C          | C          | G          | C          | T          | C          | C          | A          | C          | A          | T          | T          | C          | T          |
| 45       | PI 500359   | ZM 1065                        | M              | <i>Cs. var. sativus</i>          | Zambia               | C           | A          | G          | G          | T          | T          | T          | T          | A          | T          | T          | C          | C          | A          | C          | A          | T          | T          | G          | A          |
| 46       | PI 500361   | Inyangu                        | M              | <i>Cs. var. sativus</i>          | Zambia               | C           | A          | G          | G          | T          | C          | T          | T          | A          | T          | T          | C          | C          | A          | C          | A          | T          | T          | C          | A          |
| 47       | PI 500365   | Chibimbi                       | M              | <i>Cs. var. sativus</i>          | Zambia               | C           | A          | G          | G          | T          | T          | T          | T          | A          | T          | T          | C          | C          | A          | C          | A          | T          | T          | C          | A          |
| 48       | PI 482412   | TGR 580                        | M              | <i>Cs. var. sativus</i>          | Zimbabwe             | C           | A          | G          | G          | T          | T          | T          | T          | G          | T          | T          | C          | C          | A          | C          | A          | T          | T          | C          | A          |

\* The SNP positions are based on 9930 V2.0. Genome data are from Yang et al. (2012), and Qi et al. (2013). The repeat unit of the *F* locus (~30 kb) is from 24,217,232 to 24,247,474 in 9930 V2.0.

|   | 24.222.140 | 24.223.241 | 24.223.245 | 24.226.857 | 24.227.034 | 24.227.349 | 24.229.168 | 24.229.194 | 24.229.482 | 24.229.619 | 24.233.704 | 24.234.010 | 24.236.089 | 24.236.195 | 24.236.212 | 24.236.380 | 24.236.801 | 24.237.028 | 24.237.206 | 24.237.254 | 24.238.678 | 24.238.966 | 24.240.300 | 24.242.378 | 24.244.219 | 24.245.834 | 24.245.869 | 24.245.888 | 24.246.390 | 24.247.113 |
|---|------------|------------|------------|------------|------------|------------|------------|------------|------------|------------|------------|------------|------------|------------|------------|------------|------------|------------|------------|------------|------------|------------|------------|------------|------------|------------|------------|------------|------------|------------|
|   |            | MYB        | MYB        | MYB        | MYB        | MYB        | MYB        | MYB        | MYB        | MYB        | MYB        | MYB        | MYB        | MYB        | MYB        | MYB        | MYB        | MYB        | MYB        | MYB        |            |            |            |            | BCAT       | BCAT       | BCAT       | BCAT       | BCAT       |            |
| C | G          | G          | T          | T          | A          | A          | -          | G          | G          | A          | C          | A          | C          | A          | T          | G          | G          | T          | T          | G          | T          | C          | G          | G          | A          | T          | T          | G          | A          |            |
| C | G          | G          | T          | T          | A          | A          | -          | G          | G          | A          | C          | A          | C          | A          | T          | G          | G          | T          | T          | G          | T          | C          | G          | A          | A          | T          | T          | G          | A          |            |
| C | G          | G          | T          | T          | A          | A          | -          | G          | G          | A          | C          | A          | C          | A          | T          | G          | G          | T          | T          | G          | T          | C          | G          | A          | A          | T          | T          | G          | A          |            |
| C | G          | G          | T          | T          | A          | A          | -          | G          | G          | A          | C          | A          | C          | A          | T          | G          | G          | T          | T          | G          | T          | C          | G          | A          | A          | T          | T          | G          | A          |            |
| C | G          | G          | T          | T          | A          | A          | -          | G          | G          | A          | C          | A          | C          | A          | T          | G          | G          | T          | T          | G          | T          | C          | G          | A          | A          | T          | T          | G          | A          |            |
| C | G          | G          | T          | T          | A          | A          | -          | G          | G          | A          | C          | A          | C          | A          | T          | G          | G          | T          | T          | G          | T          | C          | G          | A          | A          | T          | T          | G          | A          |            |
| C | G          | G          | T          | T          | A          | A          | -          | G          | G          | A          | C          | A          | C          | A          | T          | G          | G          | T          | T          | G          | T          | C          | G          | A          | A          | T          | T          | G          | A          |            |
| C | G          | G          | T          | T          | A          | A          | -          | G          | G          | A          | C          | A          | C          | A          | T          | G          | G          | T          | T          | G          | T          | C          | G          | A          | A          | T          | T          | G          | A          |            |
| C | G          | G          | T          | T          | A          | A          | -          | G          | G          | A          | C          | A          | C          | A          | T          | G          | G          | T          | T          | G          | T          | C          | G          | A          | A          | T          | T          | G          | A          |            |
| C | G          | G          | T          | T          | A          | A          | -          | G          | G          | A          | C          | A          | C          | A          | T          | G          | G          | T          | T          | G          | T          | C          | G          | A          | A          | T          | T          | G          | A          |            |
| C | G          | G          | T          | T          | A          | A          | -          | G          | G          | A          | C          | A          | C          | A          | T          | G          | G          | T          | T          | G          | T          | C          | G          | A          | A          | T          | T          | G          | A          |            |
| C | G          | G          | T          | T          | A          | A          | -          | G          | G          | A          | C          | A          | C          | A          | T          | G          | G          | T          | T          | G          | T          | C          | G          | A          | A          | T          | T          | G          | A          |            |
| C | G          | G          | T          | T          | A          | A          | -          | G          | G          | A          | C          | A          | C          | A          | T          | G          | G          | T          | T          | G          | T          | C          | G          | A          | A          | T          | T          | G          | A          |            |
| C | G          | G          | T          | T          | A          | A          | -          | G          | G          | A          | C          | A          | C          | A          | T          | G          | G          | T          | T          | G          | T          | C          | G          | A          | A          | T          | T          | G          | A          |            |
| C | G          | G          | T          | T          | A          | A          | -          | G          | G          | A          | C          | A          | C          | A          | T          | G          | G          | T          | T          | G          | T          | C          | G          | A          | A          | T          | T          | G          | A          |            |
| C | G          | G          | T          | T          | A          | A          | -          | G          | G          | A          | C          | A          | C          | A          | T          | G          | G          | T          | T          | G          | T          | C          | G          | A          | A          | T          | T          | G          | A          |            |
| C | G          | G          | T          | T          | A          | A          | -          | G          | G          | A          | C          | A          | C          | A          | T          | G          | G          | T          | T          | G          | T          | C          | G          | A          | A          | T          | T          | G          | A          |            |
| C | G          | G          | T          | T          | A          | A          | -          | G          | G          | A          | C          | A          | C          | A          | T          | G          | G          | T          | T          | G          | T          | C          | G          | A          | A          | T          | T          | G          | A          |            |
| C | G          | G          | T          | T          | A          | A          | -          | G          | G          | A          | C          | A          | C          | A          | T          | G          | G          | T          | T          | G          | T          | C          | G          | A          | A          | T          | T          | G          | A          |            |
| C | G          | G          | T          | T          | A          | A          | -          | G          | G          | A          | C          | A          | C          | A          | T          | G          | G          | T          | T          | G          | T          | C          | G          | A          | A          | T          | T          | G          | A          |            |
| C | G          | G          | T          | T          | A          | A          | -          | G          | G          | A          | C          | A          | C          | A          | T          | G          | G          | T          | T          | G          | T          | C          | G          | A          | A          | T          | T          | G          | A          |            |
| C | G          | G          | T          | T          | A          | A          | -          | G          | G          | A          | C          | A          | C          | A          | T          | G          | G          | T          | T          | G          | T          | C          | G          | A          | A          | T          | T          | G          | A          |            |
| C | G          | G          | T          | T          | A          | A          | -          | G          | G          | A          | C          | A          | C          | A          | T          | G          | G          | T          | T          | G          | T          | C          | G          | A          | A          | T          | T          | G          | A          |            |
| C | G          | G          | T          | T          | A          | A          | -          | G          | G          | A          | C          | A          | C          | A          | T          | G          | G          | T          | T          | G          | T          | C          | G          | A          | A          | T          | T          | G          | A          |            |
| C | G          | G          | T          | T          | A          | A          | -          | G          | G          | A          | C          | A          | C          | A          | T          | G          | G          | T          | T          | G          | T          | C          | G          | A          | A          | T          | T          | G          | A          |            |
| C | G          | G          | T          | T          | A          | A          | -          | G          | G          | A          | C          | A          | C          | A          | T          | G          | G          | T          | T          | G          | T          | C          | G          | A          | A          | T          | T          | G          | A          |            |
| C | G          | G          | T          | T          | A          | A          | -          | G          | G          | A          | C          | A          | C          | A          | T          | G          | G          | T          | T          | G          | T          | C          | G          | A          | A          | T          | T          | G          | A          |            |
| C | G          | G          | T          | T          | A          | A          | -          | G          | G          | A          | C          | A          | C          | A          | T          | G          | G          | T          | T          | G          | T          | C          | G          | A          | A          | T          | T          | G          | A          |            |
| C | G          | G          | T          | T          | A          | A          | -          | G          | G          | A          | C          | A          | C          | A          | T          | G          | G          | T          | T          | G          | T          | C          | G          | A          | A          | T          | T          | G          | A          |            |
| C | G          | G          | T          | T          | A          | A          | -          | G          | G          | A          | C          | A          | C          | A          | T          | G          | G          | T          | T          | G          | T          | C          | G          | A          | A          | T          | T          | G          | A          |            |
| C | G          | G          | T          | T          | A          | A          | -          | G          | G          | A          | C          | A          | C          | A          | T          | G          | G          | T          | T          | G          | T          | C          | G          | A          | A          | T          | T          | G          | A          |            |



**Supplementary File 7 (Figure S4).** Phylogenetic tree of 48 cucumber lines based on 68 SNPs and 3 indels within the 50-kb genomic region at the *F* locus. Details of the accessions, and markers are provided in Table S2.

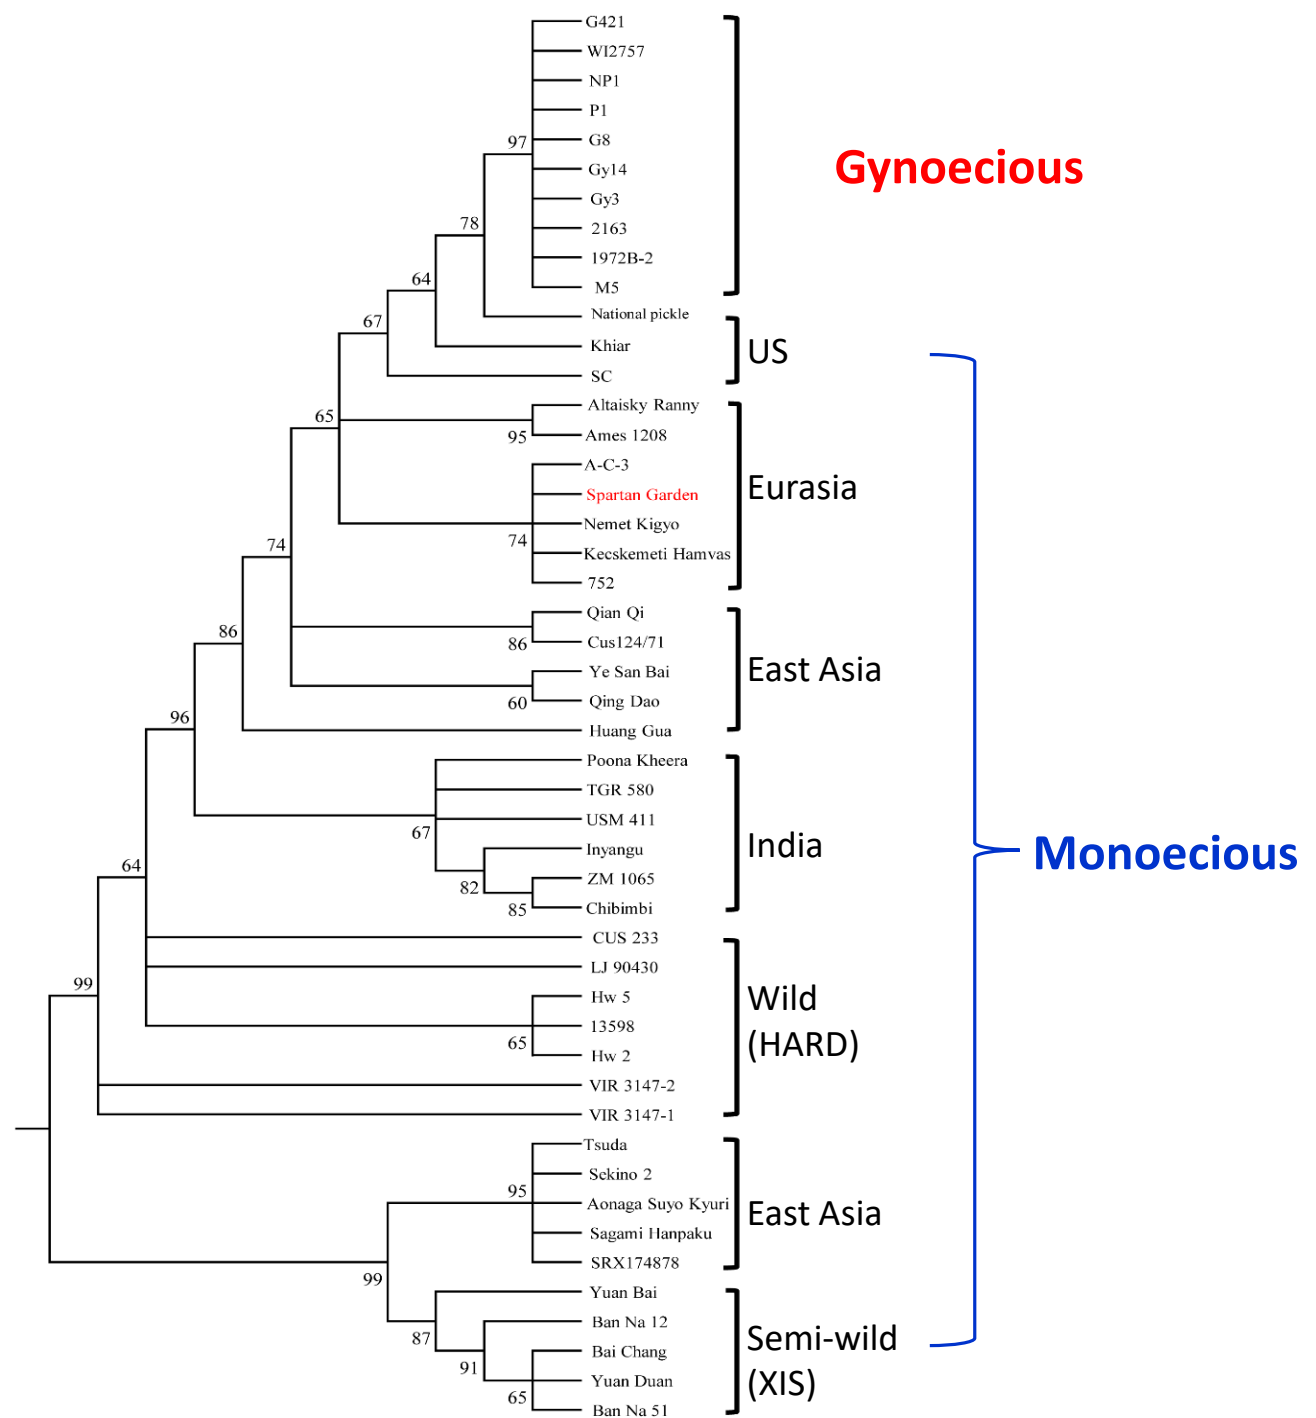

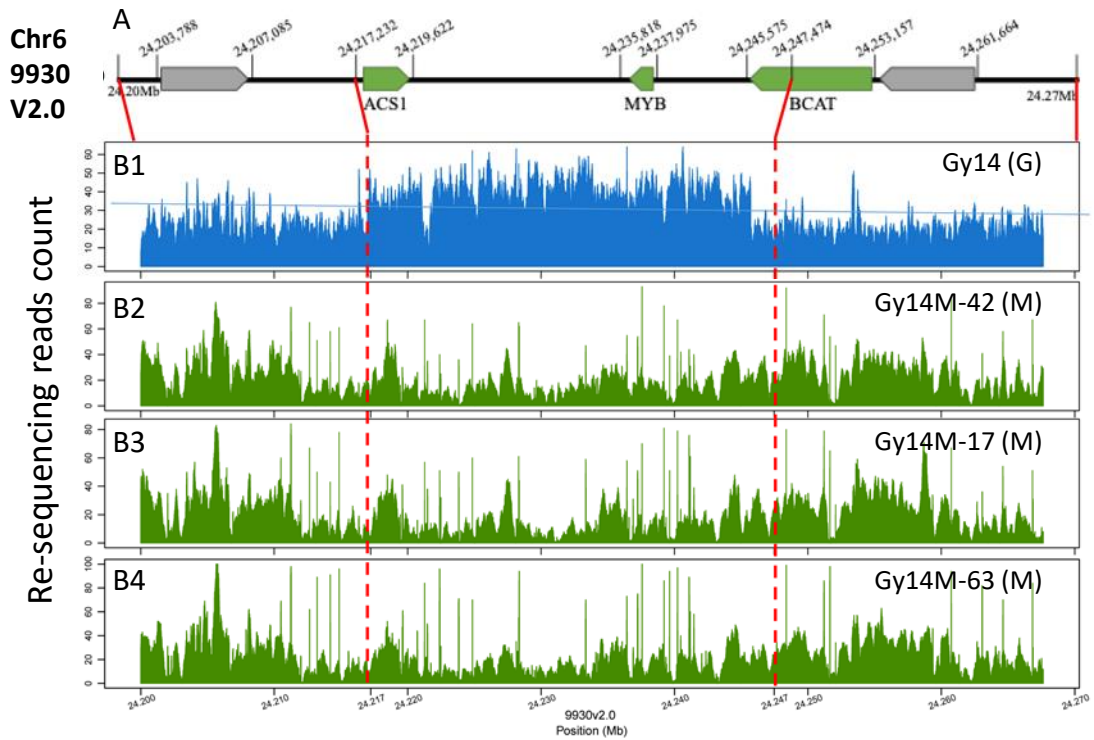

**Supplemental File 8 (Figure S5). Copy number variation at this *F* locus in ‘gynoecy loss’ cucumber mutants.** This region has ~30 kb in the monoecious line 9930 with three predicted genes (top, coordinates based on V2.0). Alignment of re-sequencing reads against the 30 kb region of 9930 reveals loss of the extra copy in the three monoecious mutants (B2-B4) as compared to their parental line Gy14 (B1). Vertical red dotted lines delimit the CNV region.



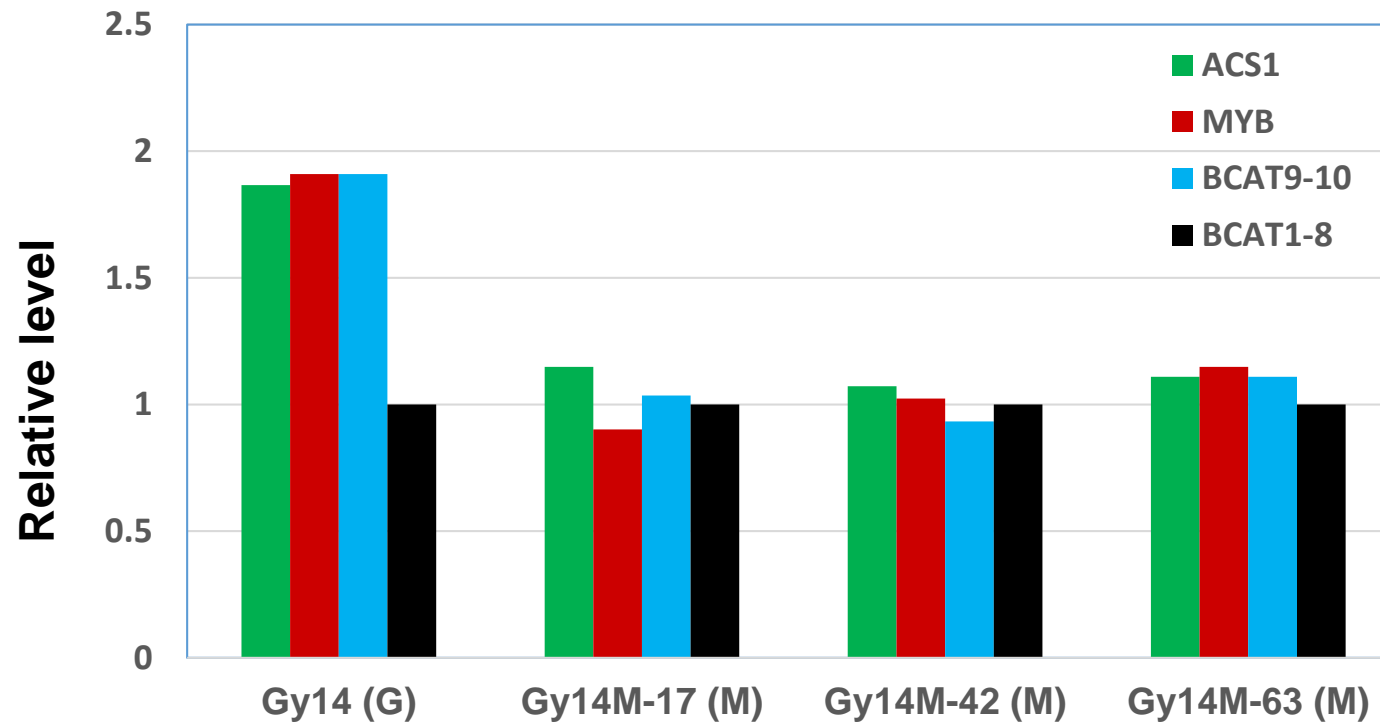

**Supplementary File 9 (Figure S6).** Copy numbers of different regions revealed by qPCR among Gy14 and the three ‘gynocy-loss’ (Gy14M-17/42/63) lines. The detailed assay is according to Fig. 3B and C.

**Supplementary File 10 (Figure S7).**

Sex expression of the F<sub>1</sub> plants from Gy14 × 9930 (A and B), Gy14M-17 × 9930 (C), and Gy14M42 × 9930 crosses (D). Plants in A and B are subgynoecious, and those in C and D are monoecious. Red and blue arrows indicate the male flowers in subgynoecious plants (A and B), and ovaries (female flowers) in monoecious plants (C and D), respectively.

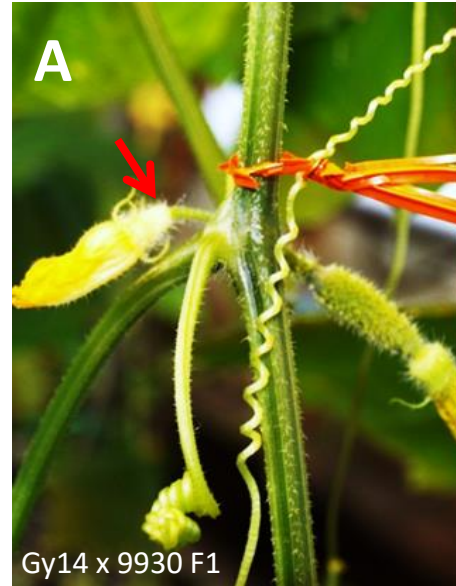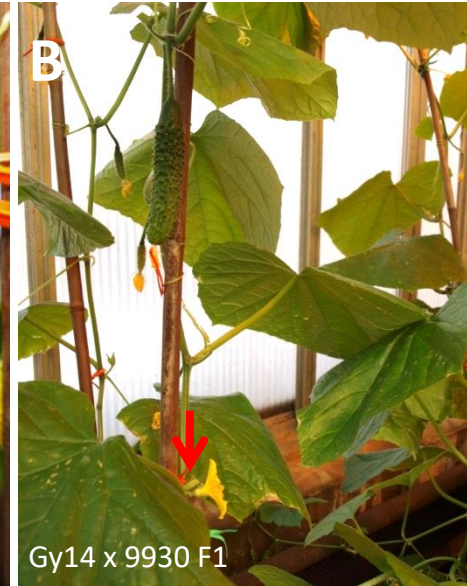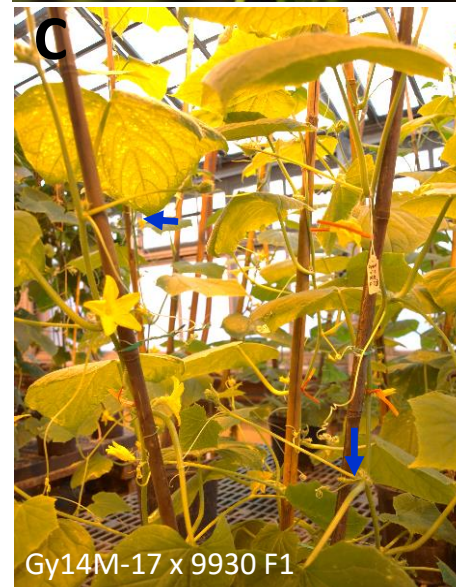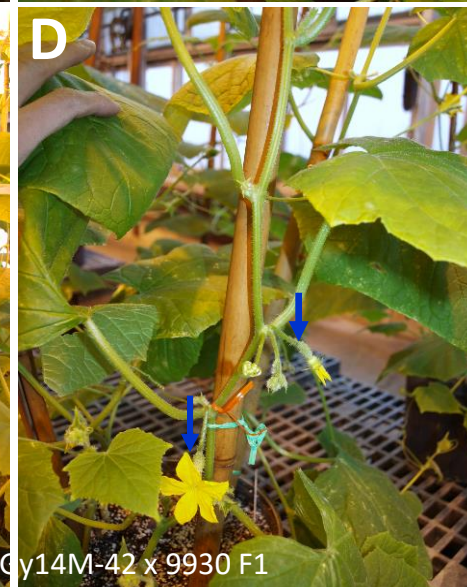

Supplement: 41438_2020_251_MOESM1_ESM.pdf [file 41438_2020_251_MOESM1_ESM.pdf]
